# Supplementary material
Source: bioRxiv or medRxiv preprint supplement (https://www.biorxiv.org/highwire/filestream/123981/field_highwire_adjunct_files/0/401307-1.pdf)

**Supplementary Table S1: Antibodies used in this study.**

| <b>Antibody</b> | <b>Catalog Number</b> | <b>Company</b>              | <b>Dilution</b> | <b>Application</b> |
|-----------------|-----------------------|-----------------------------|-----------------|--------------------|
| TFAP2A          | HPA028850             | Sigma-Aldrich               | 1:200<br>1:1000 | WB<br>IHC          |
| TFAP2C          | sc-53162              | Santa Cruz<br>Biotechnology | 1:200<br>1:1000 | WB<br>IHC          |
| PPAR $\gamma$   | D69                   | Cell Signaling              | 1:1000          | WB                 |
| FABP4           | AF3150                | R&D Systems                 | 1:1000          | WB                 |
| GAPDH           | 14C10                 | Cell Signaling              | 1:1000          | WB                 |

WB: Western Blot, IHC: Immunohistochemistry

## Supplementary Table S2:

**Significantly upregulated and downregulated genes following rosiglitazone treatment of UMUC1, SW780 and 5637 bladder cancer cells (FDR-adjusted  $p < 0.05$ )**

- 1) Genes uniquely upregulated in UMUC1 cells following rosiglitazone treatment
- 2) Genes uniquely upregulated in SW780 cells following rosiglitazone treatment
- 3) Genes uniquely upregulated in 5637 cells following rosiglitazone treatment
- 4) Genes upregulated in common in both UMUC1 and SW780 cells following rosiglitazone treatment
- 5) Genes upregulated in common in both SW780 and 5637 cells following rosiglitazone treatment
- 6) Genes upregulated in common in both UMUC1 and 5637 cells following rosiglitazone treatment
- 7) Genes upregulated in common in UMUC1, SW780, and 5637 cells following rosiglitazone treatment
- 8) Genes uniquely downregulated in UMUC1 cells following rosiglitazone treatment
- 9) Genes uniquely downregulated in SW780 cells following rosiglitazone treatment
- 10) Genes uniquely downregulated in 5637 cells following rosiglitazone treatment
- 11) Genes downregulated in common in UMUC1 and SW780 cells following rosiglitazone treatment
- 12) Genes downregulated in common in SW780 and 5637 cells following rosiglitazone treatment
- 13) Genes downregulated in common in UMUC1 and 5637 cells following rosiglitazone treatment
- 14) Genes downregulated in common in UMUC1, SW780, and 5637 cells following rosiglitazone treatment

# 1) Genes uniquely upregulated in UMUC1 cells following rosiglitazone treatment

|                          |                           |                          |                          |
|--------------------------|---------------------------|--------------------------|--------------------------|
| ENSG0000000457-SCYL3     | ENSG00000048544-MRPS10    | ENSG00000079277-MKNK1    | ENSG00000100299-ARSA     |
| ENSG00000001036-FUCA2    | ENSG00000050130-JKAMP     | ENSG00000079385-CEACAM1  | ENSG00000100307-CBX7     |
| ENSG00000001461-NIPAL3   | ENSG00000050344-NFE2L3    | ENSG00000080200-CRYBG3   | ENSG00000100319-ZMAT5    |
| ENSG00000001561-ENPP4    | ENSG00000050426-LETMD1    | ENSG00000080824-HSP90AA1 | ENSG00000100342-APOL1    |
| ENSG00000003436-TFPI     | ENSG00000051382-PIK3CB    | ENSG00000081087-OSTM1    | ENSG00000100348-TXN2     |
| ENSG00000004142-POLDIP2  | ENSG00000054611-TBC1D22A  | ENSG00000081177-EXD2     | ENSG00000100372-SLC25A17 |
| ENSG00000004487-KDM1A    | ENSG00000054690-PLEKHH1   | ENSG00000081760-AACS     | ENSG00000100418-DESI1    |
| ENSG00000004961-IBTK     | ENSG00000055211-GINM1     | ENSG00000082212-ME2      | ENSG00000100504-PYGL     |
| ENSG00000005001-PRSS22   | ENSG00000056736-IL17RB    | ENSG00000082515-MRPL22   | ENSG00000100505-TRIM9    |
| ENSG00000005022-SLC25A5  | ENSG00000059691-GATB      | ENSG00000083223-ZCCHC6   | ENSG00000100519-PSMC6    |
| ENSG00000005075-POLR2J   | ENSG00000060566-CREB3L3   | ENSG00000083937-CHMP2B   | ENSG00000100564-PIGH     |
| ENSG00000005700-IBTK     | ENSG00000060642-PIGV      | ENSG00000084073-ZMPSTE24 | ENSG00000100591-AHSA1    |
| ENSG00000005844-ITGAL    | ENSG00000060762-MPC1      | ENSG00000084764-MAPRE3   | ENSG00000100596-SPTLC2   |
| ENSG00000006007-GDE1     | ENSG00000060971-ACAA1     | ENSG00000085276-MECOM    | ENSG00000100804-PSMB5    |
| ENSG00000006555-TTC22    | ENSG00000061656-SPAG4     | ENSG00000086062-B4GALT1  | ENSG00000100911-PSME2    |
| ENSG00000008018-PSMB1    | ENSG00000064419-TNPO3     | ENSG00000086065-CHMP5    | ENSG00000100949-RABGGTA  |
| ENSG00000008282-SYPL1    | ENSG00000064490-RFXANK    | ENSG00000086504-MRPL28   | ENSG00000101000-PROCR    |
| ENSG00000008513-ST3GAL1  | ENSG00000064547-LPAR2     | ENSG00000086696-HSD17B2  | ENSG00000101079-NDRG3    |
| ENSG00000010030-ETV7     | ENSG00000064601-CTSA      | ENSG00000087842-PIR      | ENSG00000101084-C20orf24 |
| ENSG00000010270-STARD3NL | ENSG00000064999-ANKS1A    | ENSG00000088280-ASAP3    | ENSG00000101096-NFATC2   |
| ENSG00000010704-HFE      | ENSG00000065600-TMEM206   | ENSG00000088298-EDEM2    | ENSG00000101166-SLMO2    |
| ENSG00000011198-ABHD5    | ENSG00000065615-CYB5R4    | ENSG00000088832-FKBP1A   | ENSG00000101182-PSMA7    |
| ENSG00000012124-CD22     | ENSG00000065923-SLC9A7    | ENSG00000089127-OAS1     | ENSG00000101187-SLC04A1  |
| ENSG00000013275-PSMC4    | ENSG00000066583-ISOC1     | ENSG00000089195-TRMT6    | ENSG00000101216-GMEB2    |
| ENSG00000021355-SERPINB1 | ENSG00000066827-SIRT2     | ENSG00000089248-ERP29    | ENSG00000101276-SLC52A3  |
| ENSG00000023041-ZDHHC6   | ENSG00000067992-PDK3      | ENSG00000089327-FXYD5    | ENSG00000101310-SEC23B   |
| ENSG00000023228-NDUFS1   | ENSG00000068028-RASSF1    | ENSG00000089639-GMIP     | ENSG00000101365-IDH3B    |
| ENSG00000023516-AKAP11   | ENSG00000068137-PLEKHH3   | ENSG00000090013-BLVRB    | ENSG00000101421-CHMP4B   |
| ENSG00000023572-GLRX2    | ENSG00000068903-SIRT2     | ENSG00000090339-ICAM1    | ENSG00000101442-ACTR5    |
| ENSG00000023909-GCLM     | ENSG00000068971-PPP2R5B   | ENSG00000090432-MUL1     | ENSG00000101443-WFDC2    |
| ENSG00000025434-NR1H3    | ENSG00000069702-TGFBR3    | ENSG00000091164-TXNL1    | ENSG00000101474-APMAP    |
| ENSG00000026508-CD44     | ENSG00000069966-GNB5      | ENSG00000091947-TMEM101  | ENSG00000101574-METTL4   |
| ENSG00000027697-IFNGR1   | ENSG00000070404-FSTL3     | ENSG00000092010-PSME1    | ENSG00000101782-RIOK3    |
| ENSG00000028137-TNFRSF1B | ENSG00000070729-CNGB1     | ENSG00000092295-TGM1     | ENSG00000101842-VSIG1    |
| ENSG00000031081-ARHGAP31 | ENSG00000071073-MGAT4A    | ENSG00000093010-COMT     | ENSG00000101844-ATG4A    |
| ENSG00000032389-TSSC1    | ENSG00000072274-TFR3      | ENSG00000093144-ECHDC1   | ENSG00000101901-ALG13    |
| ENSG00000033170-FUT8     | ENSG00000072786-STK10     | ENSG00000093339-UPRT     | ENSG00000101935-AMMECR1  |
| ENSG00000033627-ATP6V0A1 | ENSG00000073150-PANX2     | ENSG00000093794-CREM     | ENSG00000102003-SYP      |
| ENSG00000035141-FAM136A  | ENSG00000073350-LLGL2     | ENSG00000093932-SMIM24   | ENSG00000102144-PGK1     |
| ENSG00000035687-ADSS     | ENSG00000073910-FRY       | ENSG00000093963-SRPK1    | ENSG00000102218-RP2      |
| ENSG00000035862-TIMP2    | ENSG00000074410-CA12      | ENSG00000094256-PRTFDC1  | ENSG00000102241-HTATSF1  |
| ENSG00000036672-USP2     | ENSG00000074527-NTN4      | ENSG00000094282-TSPAN15  | ENSG00000102362-SYTL4    |
| ENSG00000040633-PHF23    | ENSG00000074842-C19orf10  | ENSG00000094337-KCNK6    | ENSG00000102390-PBDC1    |
| ENSG00000041353-RAB27B   | ENSG00000074964-ARHGEF10L | ENSG00000094338-CATSPERG | ENSG00000102580-DNAJC3   |
| ENSG00000041357-PSMA4    | ENSG00000075089-ACTR6     | ENSG00000094812-MISP     | ENSG00000102804-TSC22D1  |
| ENSG00000042062-FAM65C   | ENSG00000076944-STXBP2    | ENSG00000094875-MKNK2    | ENSG00000102981-PARD6A   |
| ENSG00000042445-RETSAT   | ENSG00000077238-IL4R      | ENSG00000100147-CCDC134  | ENSG00000103150-MLYCD    |
| ENSG00000043591-ADRB1    | ENSG00000077463-SIRT6     | ENSG00000100290-BIK      | ENSG00000103274-NUBP1    |
| ENSG00000047249-ATP6V1H  | ENSG00000077585-GPR137B   | ENSG00000100292-HMOX1    | ENSG00000103496-STX4     |
| ENSG00000047621-C12orf4  | ENSG00000079101-CLUL1     | ENSG00000100294-MCAT     | ENSG00000103502-CDIPT    |

Genes uniquely upregulated in UMUC1 cells following rosiglitazone treatment (continued)

|                          |                           |                          |                          |
|--------------------------|---------------------------|--------------------------|--------------------------|
| ENSG00000103671-TRIP4    | ENSG00000107404-DVL1      | ENSG00000114395-CYB561D2 | ENSG00000119471-HSDL2    |
| ENSG00000103740-ACSBG1   | ENSG00000107537-PHYH      | ENSG00000114480-GBE1     | ENSG00000119599-DCAF4    |
| ENSG00000103978-TMEM87A  | ENSG00000107798-LIPA      | ENSG00000114544-SLC41A3  | ENSG00000119771-KLHL29   |
| ENSG00000104047-DTWD1    | ENSG00000107864-CPBE3     | ENSG00000114573-ATP6V1A  | ENSG00000119888-EPCAM    |
| ENSG00000104112-SCG3     | ENSG00000107954-NEURL1    | ENSG00000114648-KLHL18   | ENSG00000119927-GPAM     |
| ENSG00000104140-RHOV     | ENSG00000107960-OBFC1     | ENSG00000114854-TNNC1    | ENSG00000120053-GOT1     |
| ENSG00000104267-CA2      | ENSG00000108179-PPIF      | ENSG00000115128-SF3B6    | ENSG00000120217-CD274    |
| ENSG00000104299-INTS9    | ENSG00000108352-RAPGEFL1  | ENSG00000115233-PSMD14   | ENSG00000120314-WDR55    |
| ENSG00000104312-RIPK2    | ENSG00000108582-CPD       | ENSG00000115241-PPM1G    | ENSG00000120438-TCP1     |
| ENSG00000104375-STK3     | ENSG00000108671-PSMD11    | ENSG00000115255-REEP6    | ENSG00000120549-KIAA1217 |
| ENSG00000104381-GDAP1    | ENSG00000108679-LGALS3BP  | ENSG00000115271-GCA      | ENSG00000120656-TAF12    |
| ENSG00000104549-SQLE     | ENSG00000108846-ABCC3     | ENSG00000115317-HTRA2    | ENSG00000120662-MTRF1    |
| ENSG00000104691-UBXN8    | ENSG00000109133-TMEM33    | ENSG00000115318-LOXL3    | ENSG00000120942-UBIAD1   |
| ENSG00000104756-KCTD9    | ENSG00000109270-LAMTOR3   | ENSG00000115363-EVA1A    | ENSG00000121057-AKAP1    |
| ENSG00000104763-ASAH1    | ENSG00000109452-INPP4B    | ENSG00000115520-COQ10B   | ENSG00000121680-PEX16    |
| ENSG00000104783-KCNN4    | ENSG00000109519-GRPEL1    | ENSG00000115539-PDCL3    | ENSG00000121897-LIAS     |
| ENSG00000104812-GYS1     | ENSG00000109576-AADAT     | ENSG00000115649-CNPPD1   | ENSG00000122335-SERAC1   |
| ENSG00000104825-NFKB1B   | ENSG00000109787-KLF3      | ENSG00000115652-UXS1     | ENSG00000122512-PMS2     |
| ENSG00000105220-GPI      | ENSG00000109854-HTATIP2   | ENSG00000115756-HPCAL1   | ENSG00000122643-NT5C3A   |
| ENSG00000105289-TJP3     | ENSG00000109861-CTSC      | ENSG00000115762-PLEKHB2  | ENSG00000122863-CHST3    |
| ENSG00000105364-MRPL4    | ENSG00000109919-MTCH2     | ENSG00000116016-EPAS1    | ENSG00000122873-CISD1    |
| ENSG00000105499-PLA2G4C  | ENSG00000109971-HSPA8     | ENSG00000116096-SPR      | ENSG00000123106-CCDC91   |
| ENSG00000105612-DNASE2   | ENSG00000110427-KIAA1549L | ENSG00000116199-FAM20B   | ENSG00000123609-NMI      |
| ENSG00000105643-ARRDC2   | ENSG00000110442-COMMD9    | ENSG00000116266-STXBP3   | ENSG00000123989-CHPF     |
| ENSG00000105649-RAB3A    | ENSG00000110955-ATP5B     | ENSG00000116459-ATP5F1   | ENSG00000124171-PARD6B   |
| ENSG00000105650-PDE4C    | ENSG00000110958-PTGES3    | ENSG00000116584-ARHGEF2  | ENSG00000124333-VAMP7    |
| ENSG00000105677-TMEM147  | ENSG00000111266-DUSP16    | ENSG00000116668-SWT1     | ENSG00000124374-PAIP2B   |
| ENSG00000105717-PBX4     | ENSG00000111424-VDR       | ENSG00000116704-SLC35D1  | ENSG00000124596-OARD1    |
| ENSG00000105894-PTN      | ENSG00000111652-COPS7A    | ENSG00000116761-CTH      | ENSG00000124615-MOCS1    |
| ENSG00000105953-OGDH     | ENSG00000111679-PTPN6     | ENSG00000116793-PHTF1    | ENSG00000124785-NRN1     |
| ENSG00000105963-ADAP1    | ENSG00000111716-LDHB      | ENSG00000116898-MRPS15   | ENSG00000124787-RPP40    |
| ENSG00000105991-HOXA1    | ENSG00000111726-CMAS      | ENSG00000117118-SDHB     | ENSG00000124831-LRRFIP1  |
| ENSG00000105993-DNAJB6   | ENSG00000111801-BTN3A3    | ENSG00000117133-RPF1     | ENSG00000124839-RAB17    |
| ENSG00000106031-HOXA13   | ENSG00000111802-TDP2      | ENSG00000117153-KLHL12   | ENSG00000125037-EMC3     |
| ENSG00000106049-HIBADH   | ENSG00000111846-GCNT2     | ENSG00000117266-CDK18    | ENSG00000125347-IRF1     |
| ENSG00000106052-TAX1BP1  | ENSG00000111879-FAM184A   | ENSG00000117308-GALE     | ENSG00000125351-UPF3B    |
| ENSG00000106069-CHN2     | ENSG00000111911-HINT3     | ENSG00000117362-APH1A    | ENSG00000125449-ARMC7    |
| ENSG00000106077-ABHD11   | ENSG00000112294-ALDH5A1   | ENSG00000117410-ATP6V0B  | ENSG00000125611-CHCHD5   |
| ENSG00000106153-CHCHD2   | ENSG00000112335-SNX3      | ENSG00000117472-TSPAN1   | ENSG00000125656-CLPP     |
| ENSG00000106327-TFR2     | ENSG00000112379-KIAA1244  | ENSG00000117528-ABCD3    | ENSG00000125657-TNFSF9   |
| ENSG00000106366-SERPINE1 | ENSG00000112425-EPM2A     | ENSG00000117592-PRDX6    | ENSG00000125744-RTN2     |
| ENSG00000106367-AP1S1    | ENSG00000112559-MDFI      | ENSG00000117758-STX12    | ENSG00000125775-SDCBP2   |
| ENSG00000106524-ANKMY2   | ENSG00000112561-TFEB      | ENSG00000118162-KPTN     | ENSG00000125843-AP5S1    |
| ENSG00000106588-PSMA2    | ENSG00000112759-SLC29A1   | ENSG00000118308-LRMP     | ENSG00000125870-SNRPB2   |
| ENSG00000106615-RHEB     | ENSG00000112773-FAM46A    | ENSG00000118503-TNFAIP3  | ENSG00000125945-ZNF436   |
| ENSG00000106683-LIMK1    | ENSG00000112996-MRPS30    | ENSG00000118640-VAMP8    | ENSG00000125977-EIF2S2   |
| ENSG00000106991-ENG      | ENSG00000113732-ATP6V0E1  | ENSG00000118855-MFSD1    | ENSG00000126067-PSMB2    |
| ENSG00000107099-DOCK8    | ENSG00000113812-ACTR8     | ENSG00000118939-UCHL3    | ENSG00000126267-COX6B1   |
| ENSG00000107185-RGP1     | ENSG00000113845-TIMMDC1   | ENSG00000119392-GLE1     | ENSG00000126561-STAT5A   |
| ENSG00000107262-BAG1     | ENSG00000113916-BCL6      | ENSG00000119421-NDUFA8   | ENSG00000127311-HELB     |

Genes uniquely upregulated in UMUC1 cells following rosiglitazone treatment (continued)

|                           |                          |                            |                          |
|---------------------------|--------------------------|----------------------------|--------------------------|
| ENSG00000127399-LRRC61    | ENSG00000132821-VSTM2L   | ENSG00000136715-SAP130     | ENSG00000141574-SECTM1   |
| ENSG00000127418-FGFR11    | ENSG00000132825-PPP1R3D  | ENSG00000136717-BIN1       | ENSG00000141738-GRB7     |
| ENSG00000127824-TUBA4A    | ENSG00000132953-XPO4     | ENSG00000136802-LRRC8A     | ENSG00000141971-MVB12A   |
| ENSG00000127884-ECHS1     | ENSG00000132963-POMP     | ENSG00000136816-TOR1B      | ENSG00000141977-CIB3     |
| ENSG00000127948-POR       | ENSG00000133116-KL       | ENSG00000136840-ST6GALNAC4 | ENSG00000142168-SOD1     |
| ENSG00000128016-ZFP36     | ENSG00000133318-RTN3     | ENSG00000136874-STX17      | ENSG00000142669-SH3BGR13 |
| ENSG00000128165-ADM2      | ENSG00000133321-RARRES3  | ENSG00000136932-C9orf156   | ENSG00000142794-NBPF3    |
| ENSG00000128335-APOL2     | ENSG00000133328-HRASLS2  | ENSG00000137055-PLAA       | ENSG00000142875-PRKACB   |
| ENSG00000128524-ATP6V1F   | ENSG00000133398-MED10    | ENSG00000137145-DENND4C    | ENSG00000142961-MOB3C    |
| ENSG00000128564-VGF       | ENSG00000133619-KRBA1    | ENSG00000137309-HMGA1      | ENSG00000143106-PSMA5    |
| ENSG00000128654-MTX2      | ENSG00000133687-TMTC1    | ENSG00000137414-FAM8A1     | ENSG00000143162-CREG1    |
| ENSG00000128965-CHAC1     | ENSG00000133731-IMPAA1   | ENSG00000137501-SYTL2      | ENSG00000143183-TMCO1    |
| ENSG00000129128-SPCS3     | ENSG00000134153-EMC7     | ENSG00000137575-SDCBP      | ENSG00000143222-UFC1     |
| ENSG00000129244-ATP1B2    | ENSG00000134265-NAPG     | ENSG00000137714-FDX1       | ENSG00000143369-ECM1     |
| ENSG00000129355-CDKN2D    | ENSG00000134333-LDHA     | ENSG00000137752-CASP1      | ENSG00000143434-SEMA6C   |
| ENSG00000129514-FOXA1     | ENSG00000134470-IL15RA   | ENSG00000137936-BCAR3      | ENSG00000143537-IMPAA15  |
| ENSG00000130038-CRACR2A   | ENSG00000134508-CABLES1  | ENSG00000137992-DBT        | ENSG00000143546-S100A8   |
| ENSG00000130054-FAM155B   | ENSG00000134716-CYP2J2   | ENSG00000137996-RTCA       | ENSG00000143643-TTC13    |
| ENSG00000130150-MOSPD2    | ENSG00000134775-FHOD3    | ENSG00000138061-CYP1B1     | ENSG00000143797-MBOAT2   |
| ENSG00000130305-NSUN5     | ENSG00000134882-UBAC2    | ENSG00000138071-ACR2       | ENSG00000143811-PYCR2    |
| ENSG00000130312-MRPL34    | ENSG00000134954-ETS1     | ENSG00000138134-STAMBPL1   | ENSG00000143816-WNT9A    |
| ENSG00000130589-HELZ2     | ENSG00000134996-OSTF1    | ENSG00000138303-ASCC1      | ENSG00000143842-SOX13    |
| ENSG00000130707-ASS1      | ENSG00000135002-RFK      | ENSG00000138395-CDK15      | ENSG00000144021-CIAO1    |
| ENSG00000130748-TMEM160   | ENSG00000135047-CTS1     | ENSG00000138430-OLA1       | ENSG00000144034-TPRKB    |
| ENSG00000130762-ARHGEF16  | ENSG00000135070-ISCA1    | ENSG00000138669-PRKG2      | ENSG00000144136-SLC20A1  |
| ENSG00000130772-MED18     | ENSG00000135074-ADAM19   | ENSG00000138678-AGPAT9     | ENSG00000144161-ZC3H8    |
| ENSG00000130962-PRRG1     | ENSG00000135090-TAOK3    | ENSG00000138764-CNG2       | ENSG00000144224-UBXN4    |
| ENSG00000131037-EPS8L1    | ENSG00000135127-CCDC64   | ENSG00000138821-SLC39A8    | ENSG00000144362-PHOSPHO2 |
| ENSG00000131174-COX7B     | ENSG00000135148-TRAFD1   | ENSG00000139182-CLSTN3     | ENSG00000144401-METTL21A |
| ENSG00000131242-RAB11FIP4 | ENSG00000135245-HILPDA   | ENSG00000139192-TAPBPL     | ENSG00000144567-FAM134A  |
| ENSG00000131370-SH3BP5    | ENSG00000135315-CEP162   | ENSG00000139211-AMIGO2     | ENSG00000144635-DYNC1L1  |
| ENSG00000131446-MGAT1     | ENSG00000135404-CD63     | ENSG00000139405-RITA1      | ENSG00000144711-IQSEC1   |
| ENSG00000131473-ACLY      | ENSG00000135414-GDF11    | ENSG00000139436-GIT2       | ENSG00000144746-ARL6IP5  |
| ENSG00000131480-AOC2      | ENSG00000135441-BLOC1S1  | ENSG00000139636-LMBR1L     | ENSG00000144840-RABL3    |
| ENSG00000131844-MCCC2     | ENSG00000135480-KRT7     | ENSG00000139719-VPS33A     | ENSG00000144909-OSBPL11  |
| ENSG00000131931-THAP1     | ENSG00000135617-PRADC1   | ENSG00000139910-NOVA1      | ENSG00000144959-NCEH1    |
| ENSG00000131943-C19orf12  | ENSG00000135686-KLHL36   | ENSG00000140006-WDR89      | ENSG00000145050-MANF     |
| ENSG00000131944-C19orf40  | ENSG00000135723-FHOD1    | ENSG00000140199-SLC12A6    | ENSG00000145331-TRMT10A  |
| ENSG00000131979-GCH1      | ENSG00000135750-KCNK1    | ENSG00000140323-DISP2      | ENSG00000145349-CAMK2D   |
| ENSG00000132003-ZSWIM4    | ENSG00000135828-RNASEL   | ENSG00000140365-COMMD4     | ENSG00000145780-FEM1C    |
| ENSG00000132024-CC2D1A    | ENSG00000135842-FAM129A  | ENSG00000140403-DNAJA4     | ENSG00000145819-ARHGAP26 |
| ENSG00000132357-CARD6     | ENSG00000135900-MRPL44   | ENSG00000140455-USP3       | ENSG00000145879-SPINK7   |
| ENSG00000132386-SERPINF1  | ENSG00000135919-SERPINE2 | ENSG00000140465-CYP1A1     | ENSG00000145882-PCYOX1L  |
| ENSG00000132481-TRIM47    | ENSG00000135940-COX5B    | ENSG00000140474-ULK3       | ENSG00000146143-PRIM2    |
| ENSG00000132541-HRSP12    | ENSG00000135953-MFSD9    | ENSG00000140526-ABHD2      | ENSG00000146242-TPBG     |
| ENSG00000132623-ANKEF1    | ENSG00000136143-SUCLA2   | ENSG00000140612-SEC11A     | ENSG00000146433-TMEM181  |
| ENSG00000132676-DAP3      | ENSG00000136147-PHF11    | ENSG00000140961-OSGIN1     | ENSG00000146476-C6orf211 |
| ENSG00000132718-SYT11     | ENSG00000136261-BZW2     | ENSG00000141179-PCTP       | ENSG00000146535-GNAI2    |
| ENSG00000132773-TOE1      | ENSG00000136295-TTYH3    | ENSG00000141401-IMPAA2     | ENSG00000147202-DIAPH2   |
| ENSG00000132801-ZSWIM3    | ENSG00000136436-CALCOCO2 | ENSG00000141424-SLC39A6    | ENSG00000147224-PRPS1    |

Genes uniquely upregulated in UMUC1 cells following rosiglitazone treatment (continued)

|                          |                          |                          |                          |
|--------------------------|--------------------------|--------------------------|--------------------------|
| ENSG00000147457-CHMP7    | ENSG00000153774-CFDP1    | ENSG00000159556-ISL2     | ENSG00000164078-MST1R    |
| ENSG00000147654-EBAG9    | ENSG00000153982-GDPD1    | ENSG00000159720-ATP6V0D1 | ENSG00000164081-TEX264   |
| ENSG00000147676-MAL2     | ENSG00000154274-C4orf19  | ENSG00000159871-LYPD5    | ENSG00000164086-DUSP7    |
| ENSG00000147852-VLDLR    | ENSG00000154328-NEIL2    | ENSG00000159885-ZNF222   | ENSG00000164093-PITX2    |
| ENSG00000147853-AK3      | ENSG00000154518-ATP5G3   | ENSG00000160111-CPAMD8   | ENSG00000164172-MOCS2    |
| ENSG00000147874-HAUS6    | ENSG00000154556-SORBS2   | ENSG00000160180-TFF3     | ENSG00000164180-TMEM161B |
| ENSG00000148187-MRRF     | ENSG00000154639-CXADR    | ENSG00000160191-PDE9A    | ENSG00000164209-SLC25A46 |
| ENSG00000148331-ASB6     | ENSG00000154723-ATP5J    | ENSG00000160219-GAB3     | ENSG00000164305-CASP3    |
| ENSG00000148634-HERC4    | ENSG00000154727-GABPA    | ENSG00000160570-DEDD2    | ENSG00000164430-MB21D1   |
| ENSG00000148660-CAMK2G   | ENSG00000154764-WNT7A    | ENSG00000160588-MPZL3    | ENSG00000164532-TBX20    |
| ENSG00000148672-GLUD1    | ENSG00000154814-OXNAD1   | ENSG00000160685-ZBTB7B   | ENSG00000164615-CAMLG    |
| ENSG00000148719-DNAJB12  | ENSG00000154917-RAB6B    | ENSG00000160691-SHC1     | ENSG00000164758-MED30    |
| ENSG00000148798-INA      | ENSG00000155085-AK9      | ENSG00000161277-THAP8    | ENSG00000164674-SYTL3    |
| ENSG00000148834-GSTO1    | ENSG00000155090-KLF10    | ENSG00000161281-COX7A1   | ENSG00000164683-HEY1     |
| ENSG00000148925-BTBD10   | ENSG00000155100-OTUD6B   | ENSG00000161558-TMEM143  | ENSG00000164687-FABP5    |
| ENSG00000149100-EIF3M    | ENSG00000155158-TTC39B   | ENSG00000161905-ALOX15   | ENSG00000164825-DEFB1    |
| ENSG00000149218-ENDOD1   | ENSG00000155189-AGPAT5   | ENSG00000162129-CLPB     | ENSG00000164830-OXR1     |
| ENSG00000149300-C11orf52 | ENSG00000155265-GOLGA7B  | ENSG00000162337-LRP5     | ENSG00000164877-MICALL2  |
| ENSG00000149418-ST14     | ENSG00000155304-HSPA13   | ENSG00000162368-CMPK1    | ENSG00000164934-DCAF13   |
| ENSG00000149782-PLCB3    | ENSG00000155324-GRAMD3   | ENSG00000162396-PARS2    | ENSG00000164970-FAM219A  |
| ENSG00000149922-TBX6     | ENSG00000155463-OXA1L    | ENSG00000162398-C1orf177 | ENSG00000164976-KIAA1161 |
| ENSG00000149923-PPP4C    | ENSG00000155465-SLC7A7   | ENSG00000162441-LZIC     | ENSG00000164978-NUDT2    |
| ENSG00000149930-TAOK2    | ENSG00000155621-C9orf85  | ENSG00000162639-HENMT1   | ENSG00000165029-ABCA1    |
| ENSG00000150455-TIRAP    | ENSG00000155792-DEPTOR   | ENSG00000162676-GFI1     | ENSG00000165061-ZMAT4    |
| ENSG00000150527-CTAGE5   | ENSG00000155846-PPARGC1B | ENSG00000162729-IGSF8    | ENSG00000165097-KDM1B    |
| ENSG00000150636-CCDC102B | ENSG00000155858-LSM11    | ENSG00000162746-FCRLB    | ENSG00000165125-TRPV6    |
| ENSG00000150787-PTS      | ENSG00000155868-MED7     | ENSG00000162813-BPNT1    | ENSG00000165140-FBP1     |
| ENSG00000150873-C2orf50  | ENSG00000156453-PCDH1    | ENSG00000162817-C1orf115 | ENSG00000165175-MID1IP1  |
| ENSG00000150977-RILPL2   | ENSG00000156521-TYSND1   | ENSG00000162819-BROX     | ENSG00000165233-C9orf89  |
| ENSG00000151151-IPMK     | ENSG00000156709-AIFM1    | ENSG00000162836-ACP6     | ENSG00000165355-FBXO33   |
| ENSG00000151176-PLBD2    | ENSG00000156804-FBXO32   | ENSG00000162852-CNST     | ENSG00000165389-SPTSSA   |
| ENSG00000151458-ANKRD50  | ENSG00000156966-B3GNT7   | ENSG00000162927-PUS10    | ENSG00000165487-MICU2    |
| ENSG00000151461-UPF2     | ENSG00000157184-CPT2     | ENSG00000163131-CTSS     | ENSG00000165495-PKNOX2   |
| ENSG00000151465-CDC123   | ENSG00000157193-LRP8     | ENSG00000163156-SCNM1    | ENSG00000165507-C10orf10 |
| ENSG00000151470-C4orf33  | ENSG00000157782-CABP1    | ENSG00000163166-IWS1     | ENSG00000165629-ATP5C1   |
| ENSG00000151500-THYN1    | ENSG00000157827-FMNL2    | ENSG00000163249-CCNYL1   | ENSG00000165672-PRDX3    |
| ENSG00000151532-VTI1A    | ENSG00000158125-XDH      | ENSG00000163281-GNPDA2   | ENSG00000165678-GHITM    |
| ENSG00000151611-MMAA     | ENSG00000158201-ABHD3    | ENSG00000163286-ALPL2    | ENSG00000165684-SNAPC4   |
| ENSG00000151651-ADAM8    | ENSG00000158470-B4GALT5  | ENSG00000163376-KBTBD8   | ENSG00000165861-ZFYVE1   |
| ENSG00000151690-MFSD6    | ENSG00000158552-ZFAND2B  | ENSG00000163382-APOA1BP  | ENSG00000165916-PSMC3    |
| ENSG00000151729-SLC25A4  | ENSG00000158604-TMED4    | ENSG00000163412-EIF4E3   | ENSG00000165995-CACNB2   |
| ENSG00000151743-AMN1     | ENSG00000158615-PPP1R15B | ENSG00000163479-SSR2     | ENSG00000166024-R3HCC1L  |
| ENSG00000151883-PARP8    | ENSG00000158773-USF1     | ENSG00000163528-CHCHD4   | ENSG00000166145-SPINT1   |
| ENSG00000152359-POC5     | ENSG00000158882-TOMM40L  | ENSG00000163626-COX18    | ENSG00000166189-HPS6     |
| ENSG00000152377-SPOCK1   | ENSG00000159079-C21orf59 | ENSG00000163659-TIPARP   | ENSG00000166272-WBP1L    |
| ENSG00000152620-NADK2    | ENSG00000159314-ARHGAP27 | ENSG00000163661-PTX3     | ENSG00000166289-PLEKHF1  |
| ENSG00000152669-CCNO     | ENSG00000159346-ADIPOR1  | ENSG00000163686-ABHD6    | ENSG00000166311-SMPD1    |
| ENSG00000152683-SLC30A6  | ENSG00000159348-CYB5R1   | ENSG00000164054-SHISA5   | ENSG00000166411-IDH3A    |
| ENSG00000153029-MR1      | ENSG00000159377-PSMB4    | ENSG00000164062-APEH     | ENSG00000166478-ZNF143   |
| ENSG00000153233-PTPRR    | ENSG00000159399-HK2      | ENSG00000164074-C4orf29  |                          |

Genes uniquely upregulated in UMUC1 cells following rosiglitazone treatment (continued)

|                          |                           |                          |                          |
|--------------------------|---------------------------|--------------------------|--------------------------|
| ENSG00000166557-TMED3    | ENSG00000170185-USP38     | ENSG00000175315-CST6     | ENSG00000181885-CLDN7    |
| ENSG00000166595-FAM96B   | ENSG00000170340-B3GNT2    | ENSG00000175348-TMEM9B   | ENSG00000181924-COA4     |
| ENSG00000166681-NGFRAP1  | ENSG00000170379-FAM115C   | ENSG00000175416-CLTB     | ENSG00000181938-GINS3    |
| ENSG00000166710-B2M      | ENSG00000170469-SPATA24   | ENSG00000175556-LONRF3   | ENSG00000182199-SHMT2    |
| ENSG00000166908-PIP4K2C  | ENSG00000170477-KRT4      | ENSG00000175707-KDF1     | ENSG00000182400-TRAPPC6B |
| ENSG00000167034-NKX3-1   | ENSG00000170502-NUDT9     | ENSG00000175756-AURKAIP1 | ENSG00000182405-PGBD4    |
| ENSG00000167113-COQ4     | ENSG00000170638-TRABD     | ENSG00000175893-ZDHHC21  | ENSG00000182704-TSKU     |
| ENSG00000167703-SLC43A2  | ENSG00000171124-FUT3      | ENSG00000176092-AIM1L    | ENSG00000182919-C11orf54 |
| ENSG00000167757-KLK11    | ENSG00000171155-C1GALT1C1 | ENSG00000176101-SSNA1    | ENSG00000182957-SPATA13  |
| ENSG00000167772-ANGPTL4  | ENSG00000171163-ZNF692    | ENSG00000176182-MYPOP    | ENSG00000182993-C12orf60 |
| ENSG00000167815-PRDX2    | ENSG00000171223-JUNB      | ENSG00000176194-CIDEA    | ENSG00000183111-ARHGEF37 |
| ENSG00000167861-HID1     | ENSG00000171224-C10orf35  | ENSG00000176531-PHLDB3   | ENSG00000183145-RIPPLY3  |
| ENSG00000167925-GHDC     | ENSG00000171310-CHST11    | ENSG00000176542-KIAA2018 | ENSG00000183506-PI4KAP2  |
| ENSG00000167977-KCTD5    | ENSG00000171428-NAT1      | ENSG00000176678-FOXL1    | ENSG00000183826-BTBD9    |
| ENSG00000168002-POLR2G   | ENSG00000171497-PPID      | ENSG00000176845-METRNL   | ENSG00000183914-DNAH2    |
| ENSG00000168000-ETFPD3   | ENSG00000171503-ETFDH     | ENSG00000176871-WSB2     | ENSG00000184076-UQCOR10  |
| ENSG00000168079-SCARA5   | ENSG00000171522-PTGER4    | ENSG00000177119-ANO6     | ENSG00000184277-TM2D3    |
| ENSG00000168216-LMBRD1   | ENSG00000171763-SPATA5L1  | ENSG00000177283-FZD8     | ENSG00000184292-TACSTD2  |
| ENSG00000168243-GNG4     | ENSG00000171812-COL8A2    | ENSG00000177303-CASKIN2  | ENSG00000184378-ACTRT3   |
| ENSG00000168275-COA6     | ENSG00000171867-PRNP      | ENSG00000177380-PPFIA3   | ENSG00000184481-FOXA0    |
| ENSG00000168288-MMADHC   | ENSG00000171903-CYP4F11   | ENSG00000177465-ACOT4    | ENSG00000184523-PTGER4P2 |
| ENSG00000168398-BDKRB2   | ENSG00000171928-TVP23B    | ENSG00000177853-ZNF518A  | ENSG00000185015-CA13     |
| ENSG00000168404-MLKL     | ENSG00000171956-FOXB1     | ENSG00000177885-GRB2     | ENSG00000185043-CIB1     |
| ENSG00000168453-HR       | ENSG00000172183-ISG20     | ENSG00000178038-ALS2CL   | ENSG00000185100-ADSSL1   |
| ENSG00000168476-REEP4    | ENSG00000172269-DPAGT1    | ENSG00000178078-STAP2    | ENSG00000185127-C6orf120 |
| ENSG00000168528-SERINC2  | ENSG00000172270-BSG       | ENSG00000178096-BOLA1    | ENSG00000185222-WBP5     |
| ENSG00000168672-FAM84B   | ENSG00000172331-BPGM      | ENSG00000178150-ZNF114   | ENSG00000185238-PRMT3    |
| ENSG00000168899-VAMP5    | ENSG00000172465-TCEAL1    | ENSG00000178363-CALML3   | ENSG00000185483-ROR1     |
| ENSG00000168917-SLC35G2  | ENSG00000172936-MYD88     | ENSG00000178381-ZFAND2A  | ENSG00000185515-BRCC3    |
| ENSG00000169021-UQCRFS1  | ENSG00000172939-OXSR1     | ENSG00000178537-SLC25A20 | ENSG00000185591-SP1      |
| ENSG00000169032-MAP2K1   | ENSG00000172985-SH3RF3    | ENSG00000178741-COX5A    | ENSG00000185614-FAM212A  |
| ENSG00000169203-NPIP     | ENSG00000173153-ESRRA     | ENSG00000178896-EXOSC4   | ENSG00000185627-PSMD13   |
| ENSG00000169223-LMAN2    | ENSG00000173156-RHOD      | ENSG00000178951-ZBTB7A   | ENSG00000185803-SLC52A2  |
| ENSG00000169241-SLC50A1  | ENSG00000173227-SYT12     | ENSG00000178952-TUFM     | ENSG00000185825-BCAP31   |
| ENSG00000169255-B3GALNT1 | ENSG00000173264-GPR137    | ENSG00000178982-EIF3K    | ENSG00000185875-THNSL1   |
| ENSG00000169258-GPRIN1   | ENSG00000173457-PPP1R14B  | ENSG00000179041-RRS1     | ENSG00000185883-ATP6V0C  |
| ENSG00000169330-KIAA1024 | ENSG00000173486-FKBP2     | ENSG00000179091-CYC1     | ENSG00000185924-RTN4RL1  |
| ENSG00000169403-PTAFR    | ENSG00000173548-SNX33     | ENSG00000179115-FARSA    | ENSG00000186010-NDUFA13  |
| ENSG00000169418-NPR1     | ENSG00000173559-NABP1     | ENSG00000179241-LDLRAD3  | ENSG00000186130-ZBTB6    |
| ENSG00000169427-KCNK9    | ENSG00000173599-PC        | ENSG00000179403-VWA1     | ENSG00000186132-C2orf76  |
| ENSG00000169435-RASSF6   | ENSG00000174013-FBXO45    | ENSG00000179630-LACC1    | ENSG00000186283-TOR3A    |
| ENSG00000169504-CLIC4    | ENSG00000174130-TLR6      | ENSG00000179918-SEPHS2   | ENSG00000186462-NAP1L2   |
| ENSG00000169598-DFFB     | ENSG00000174151-CYB561D1  | ENSG00000179958-DCTPP1   | ENSG00000186526-CYP4F8   |
| ENSG00000169682-SPNS1    | ENSG00000174307-PHLDA3    | ENSG00000180104-EXOC3    | ENSG00000186529-CYP4F3   |
| ENSG00000169684-CHRNA5   | ENSG00000174405-LIG4      | ENSG00000180353-HCLS1    | ENSG00000186642-PDE2A    |
| ENSG00000169851-PCDH7    | ENSG00000174567-GOLT1A    | ENSG00000180881-CAPS2    | ENSG00000186665-C17orf58 |
| ENSG00000169860-P2RY1    | ENSG00000174749-C4orf32   | ENSG00000180884-ZNF792   | ENSG00000186684-CYP27C1  |
| ENSG00000169914-OTUD3    | ENSG00000175073-VCPIP1    | ENSG00000181274-FRAT2    | ENSG00000187051-RPS19BP1 |
| ENSG00000170088-TMEM192  | ENSG00000175183-CSRP2     | ENSG00000181585-TMIE     | ENSG00000187446-CHP1     |
| ENSG00000170142-UBE2E1   | ENSG00000175294-CATSPER1  | ENSG00000181751-C5orf30  | ENSG00000187531-SIRT7    |

Genes uniquely upregulated in UMUC1 cells following rosiglitazone treatment (continued)

|                             |                                |                               |                                |
|-----------------------------|--------------------------------|-------------------------------|--------------------------------|
| ENSG00000187837-HIST1H1C    | ENSG00000198805-PNP            | ENSG00000223700-AC104395.1    | ENSG00000243646-IL10RB         |
| ENSG00000187984-ANKRD19P    | ENSG00000198825-INPP5F         | ENSG00000223784-RP11-55418.2  | ENSG00000244048-RPS18P6        |
| ENSG00000188051-TMEM221     | ENSG00000198855-FICD           | ENSG00000223875-NBEAP3        | ENSG00000244242-IFITM10        |
| ENSG00000188257-PLA2G2A     | ENSG00000198863-RNUDC1         | ENSG00000223980-HLA-A         | ENSG00000246526-RP11-539L10.2  |
| ENSG00000188522-FAM83G      | ENSG00000198873-GRK5           | ENSG00000224032-EPB41L4A-AS1  | ENSG00000247271-ZBED5-AS1      |
| ENSG00000188549-C15orf52    | ENSG00000198937-CCDC167        | ENSG00000224051-CPTP          | ENSG00000247596-TWF2           |
| ENSG00000188559-RALGAPA2    | ENSG00000198948-MFAP3L         | ENSG00000224100-AP001630.5    | ENSG00000247626-MARS2          |
| ENSG00000188603-CLN3        | ENSG00000203392-CTD-2026K11.6  | ENSG00000224773-HSPA8P7       | ENSG00000248099-INSL3          |
| ENSG00000188690-UROS        | ENSG00000203485-INF2           | ENSG00000224857-RP11-344P13.1 | ENSG00000248124-RRN3P1         |
| ENSG00000188732-FAM221A     | ENSG00000203739-RP11-296O14.3  | ENSG00000225345-SNX18P3       | ENSG00000248175-CTC-428G20.3   |
| ENSG00000188760-TMEM198     | ENSG00000203783-PRR9           | ENSG00000225950-NTF4          | ENSG00000250722-SEPP1          |
| ENSG00000188811-NHLRC3      | ENSG00000203814-HIST2H2BF      | ENSG00000226562-CYP4F26P      | ENSG00000251141-RP11-53O19.1   |
| ENSG00000188917-TRMT2B      | ENSG00000204070-SYS1           | ENSG00000227471-AKR1B15       | ENSG00000253738-OTUD6B-AS1     |
| ENSG00000189212-DPY19L2P1   | ENSG00000204272-LINC01420      | ENSG00000227953-LINC01341     | ENSG00000253972-RP11-4K16.2    |
| ENSG00000196074-SYCP2       | ENSG00000204673-AKT1S1         | ENSG00000228299-HLA-C         | ENSG00000254783-RP11-320L11.2  |
| ENSG00000196116-TDRD7       | ENSG00000204860-FAM201A        | ENSG00000228340-MIR646HG      | ENSG00000256462-RP11-116G8.5   |
| ENSG00000196151-WDSUB1      | ENSG00000204923-FBXO48         | ENSG00000228434-AC004951.6    | ENSG00000257052-RP11-881M11.2  |
| ENSG00000196378-ZNF34       | ENSG00000204967-PCDHA4         | ENSG00000228672-PROB1         | ENSG00000258077-RP11-114H23.1  |
| ENSG00000196449-YRDC        | ENSG00000205220-PSMB10         | ENSG00000228794-LINC01128     | ENSG00000258377-RP11-649E7.5   |
| ENSG00000196505-GDAP2       | ENSG00000205356-TECPR1         | ENSG00000229715-EEF1DP3       | ENSG00000258981-COX5AP2        |
| ENSG00000196544-C17orf59    | ENSG00000205413-SAMD9          | ENSG00000230479-AP000695.6    | ENSG00000259275-RP11-522B15.3  |
| ENSG00000196593-ANKRD20A19P | ENSG00000205517-RGL3           | ENSG00000230650-AC112229.1    | ENSG00000259714-LINC00594      |
| ENSG00000196670-ZFP62       | ENSG00000206140-TMEM191C       | ENSG00000231196-RP11-495P10.8 | ENSG00000259838-TCEB1P2        |
| ENSG00000196839-ADA         | ENSG00000206450-HLA-B          | ENSG00000231345-BEND3P1       | ENSG00000260336-RP11-395B7.7   |
| ENSG00000196873-CBWD3       | ENSG00000207399-RNU6-1011P     | ENSG00000232126-HLA-B         | ENSG00000260461-RP11-541N10.3  |
| ENSG00000196954-CASP4       | ENSG00000210077-MT-TV          | ENSG00000233190-RPS24P13      | ENSG00000260742-RP11-366L5.1   |
| ENSG00000196961-AP2A1       | ENSG00000210082-MT-RNR2        | ENSG00000233217-MROH3P        | ENSG00000260841-CTC-205M6.5    |
| ENSG00000197063-MAFG        | ENSG00000212864-RNF208         | ENSG00000234176-HSPA8P1       | ENSG00000260852-FBXL19-AS1     |
| ENSG00000197150-ABCB8       | ENSG00000212866-HSPA1B         | ENSG00000234283-RP11-495P10.6 | ENSG00000260917-RP11-541N14.4  |
| ENSG00000197170-PSMD12      | ENSG00000213199-ASIC3          | ENSG00000234518-PTGES3P1      | ENSG00000260934-CTA-363E6.7    |
| ENSG00000197261-C6orf141    | ENSG00000213391-RP11-66N11.6   | ENSG00000234699-RP11-225H22.4 | ENSG00000261068-RP11-7K24.3    |
| ENSG00000197279-ZNF165      | ENSG00000213614-HEXA           | ENSG00000234962-LINC00700     | ENSG00000261104-RP11-734K21.5  |
| ENSG00000197444-OGDHL       | ENSG00000213619-NDUFS3         | ENSG00000235217-TSPY26P       | ENSG00000261286-RP11-517C16.2  |
| ENSG00000197448-GSTK1       | ENSG00000213889-PPM1N          | ENSG00000235944-ZNF815P       | ENSG00000261437-RP11-22C11.2   |
| ENSG00000197457-STMN3       | ENSG00000213930-GALT           | ENSG00000236287-ZBED5         | ENSG00000261455-LINC01003      |
| ENSG00000197746-PSAP        | ENSG00000213965-NUDT19         | ENSG00000236423-LINC01134     | ENSG00000261534-RP11-244O19.1  |
| ENSG00000197774-EME2        | ENSG00000214248-CTD-3193O13.12 | ENSG00000236496-GPS2P1        | ENSG00000261578-RP11-21L23.2   |
| ENSG00000197780-TAF13       | ENSG00000214517-PPME1          | ENSG00000236824-BCYRN1        | ENSG00000261740-RP11-345J4.5   |
| ENSG00000197818-SLC9A8      | ENSG00000215021-PHB2           | ENSG00000237022-HLA-C         | ENSG00000261786-RP4-555D20.2   |
| ENSG00000197971-MBP         | ENSG00000215039-CD27-AS1       | ENSG00000237172-B3GNT9        | ENSG00000262583-RP11-77K12.5   |
| ENSG00000198001-IRAK4       | ENSG00000215251-FASTKD5        | ENSG00000237289-CKMT1B        | ENSG00000263956-NBPF11         |
| ENSG00000198026-ZNF335      | ENSG00000215328-HSPA1A         | ENSG00000238107-RP11-495P10.5 | ENSG00000265972-TXNIP          |
| ENSG00000198125-MB          | ENSG00000217442-SYCE3          | ENSG00000239472-RN7SL221P     | ENSG00000266032-AL357515.1     |
| ENSG00000198130-HIBCH       | ENSG00000217801-RP11-465B22.3  | ENSG00000240230-COX19         | ENSG00000266176-RP11-855A2.5   |
| ENSG00000198168-SVIP        | ENSG00000219200-RNASEK         | ENSG00000240344-PPIL3         | ENSG00000266208-CTD-2267D19.3  |
| ENSG00000198171-DDRGK1      | ENSG00000219891-ZSCAN12P1      | ENSG00000240854-RP11-64K7.1   | ENSG00000267056-AC005336.4     |
| ENSG00000198189-HSD17B11    | ENSG00000220205-VAMP2          | ENSG00000241732-RP11-38P22.2  | ENSG00000267062-CTD-2659N19.10 |
| ENSG00000198346-ZNF813      | ENSG00000221866-PLXNA4         | ENSG00000242147-RP13-463N16.6 | ENSG00000267475-CTD-2538C1.2   |
| ENSG00000198598-MMP17       | ENSG00000221869-CEBPD          | ENSG00000243147-MRPL33        | ENSG00000268001-CTC-241F20.3   |
| ENSG00000198794-SCAMP5      | ENSG00000223484-TRPC6P         | ENSG00000243279-PRAF2         | ENSG00000268460-DKFZp434J0226  |



Genes uniquely upregulated in UMUC1 cells following rosiglitazone treatment (continued)

ENSG00000268913-AC026806.2  
ENSG00000269926-RP11-442H21.2  
ENSG00000270011-ZNF559-ZNF177  
ENSG00000270659-RP11-105N14.1  
ENSG00000271303-SRXN1  
ENSG00000271430-RP3-368A4.5  
ENSG00000271976-RP11-884K10.7  
ENSG00000272068-RP11-284F21.9  
ENSG00000272086-CTD-2186M15.3  
ENSG00000272129-RP11-250B2.6  
ENSG00000272141-RP11-465B22.8  
ENSG00000272255-CTD-3224K15.3  
ENSG00000272405-RP11-284F21.10  
ENSG00000272414-FAM47E-STBD1  
ENSG00000272796-RP1-74M1.3  
ENSG00000272851-RP11-801F7.1  
ENSG00000273252-OR7E39P  
ENSG00000273297-RP11-38M8.1  
ENSG00000273983-HIST1H3G  
ENSG00000274012-Metazoa\_SRP  
ENSG00000274180-NATD1  
ENSG00000274523-WBSCR16  
ENSG00000274828-RP11-567M16.6  
ENSG00000275074-NUDT18  
ENSG00000275111-ZNF2  
ENSG00000275223-RP1-63M2.7  
ENSG00000275512-RP11-322E11.2  
ENSG00000276170-AC124789.1  
ENSG00000276836-AC217778.3  
ENSG00000276953-TRBV12-4  
ENSG00000277363-SRCIN1  
ENSG00000278097-AC131056.5  
ENSG00000278615-C11orf98  
ENSG00000278727-AC000403.4  
ENSG00000278970-HEIH  
ENSG00000279022-RP11-250B2.4  
ENSG00000279227-AC009303.2  
ENSG00000279272-AC109925.1  
ENSG00000279673-RP11-185E8.2  
ENSG00000280010-AP001350.4

## 2) Genes uniquely upregulated in SW780 cells following rosiglitazone treatment

|                          |                          |                          |                                |
|--------------------------|--------------------------|--------------------------|--------------------------------|
| ENSG0000006747-SCIN      | ENSG00000116717-GADD45A  | ENSG00000162576-MXRA8    | ENSG00000203499-FAM83H-AS1     |
| ENSG00000010278-CD9      | ENSG00000119408-NEK6     | ENSG00000162928-PEX13    | ENSG00000203697-CAPN8          |
| ENSG00000019102-VSIG2    | ENSG00000119411-BSPRY    | ENSG00000163568-AIM2     | ENSG00000204021-LIPK           |
| ENSG00000023445-BIRC3    | ENSG00000119917-IFIT3    | ENSG00000164266-SPINK1   | ENSG00000213694-S1PR3          |
| ENSG00000055332-EIF2AK2  | ENSG00000121068-TBX2     | ENSG00000164418-GRIK2    | ENSG00000214269-LGMNP1         |
| ENSG00000065054-SLC9A3R2 | ENSG00000121797-CCRL2    | ENSG00000165887-ANKRD2   | ENSG00000216937-CCDC7          |
| ENSG00000065717-TLE2     | ENSG00000121966-CXCR4    | ENSG00000166750-SLFN5    | ENSG00000223361-FTH1P10        |
| ENSG00000068079-IFI35    | ENSG00000122861-PLAU     | ENSG00000166828-SCNN1G   | ENSG00000223804-CH17-472G23.2  |
| ENSG00000073060-SCARB1   | ENSG00000122870-BICC1    | ENSG00000166920-C15orf48 | ENSG00000223822-EEF1A1P1       |
| ENSG00000075035-WSCD2    | ENSG00000128342-LIF      | ENSG00000167468-GPX4     | ENSG00000232573-RPL3P4         |
| ENSG00000076864-RAP1GAP  | ENSG00000129451-KLK10    | ENSG00000167676-PLIN4    | ENSG00000233056-ERVH48-1       |
| ENSG00000079459-DFIT1    | ENSG00000130055-GDPD2    | ENSG00000167767-KRT80    | ENSG00000233198-RNF224         |
| ENSG00000080031-PTPRH    | ENSG00000130193-THEM6    | ENSG00000168062-BATF2    | ENSG00000234745-HLA-B          |
| ENSG00000085831-TTC39A   | ENSG00000130224-LRCH2    | ENSG00000168447-SCNN1B   | ENSG00000238266-LINC00707      |
| ENSG00000086548-CEACAM6  | ENSG00000130487-KLHDC7B  | ENSG00000168907-PLA2G4F  | ENSG00000239510-RPL9P5         |
| ENSG00000087074-PPP1R15A | ENSG00000130600-H19      | ENSG00000169248-CXCL11   | ENSG00000242759-LINC00882      |
| ENSG00000088002-SULT2B1  | ENSG00000130829-DUSP9    | ENSG00000169474-SPRR1A   | ENSG00000243071-RP11-613M5.2   |
| ENSG00000092200-RPGRIP1  | ENSG00000131981-LGALS3   | ENSG00000169710-FASN     | ENSG00000243449-C4orf48        |
| ENSG00000095637-SORBS1   | ENSG00000132530-XAF1     | ENSG00000170190-SLC16A5  | ENSG00000245848-CEBPA          |
| ENSG00000099219-ERMP1    | ENSG00000132746-ALDH3B2  | ENSG00000171105-INSR     | ENSG00000247844-CCAT1          |
| ENSG00000103000-TSPO     | ENSG00000134184-GSTM1    | ENSG00000171130-ATP6V0E2 | ENSG00000259717-LINC00677      |
| ENSG00000101265-RASSF2   | ENSG00000134326-CMPK2    | ENSG00000171222-SCAND1   | ENSG00000263155-MYZAP          |
| ENSG00000102109-PCSK1N   | ENSG00000134955-SLC37A2  | ENSG00000171940-ZNF217   | ENSG00000265107-GJA5           |
| ENSG00000102882-MAPK3    | ENSG00000135374-ELF5     | ENSG00000172461-FUT9     | ENSG00000265170-RN7SL667P      |
| ENSG00000102890-ELMO3    | ENSG00000135549-PKIB     | ENSG00000173124-ACSM6    | ENSG00000265688-MAFG-AS1       |
| ENSG00000102996-MMP15    | ENSG00000135587-SMPD2    | ENSG00000173237-C11orf86 | ENSG00000267237-AC092299.6     |
| ENSG00000103034-NDRG4    | ENSG00000135899-SP110    | ENSG00000175567-UCP2     | ENSG00000267368-UPK3BL         |
| ENSG00000103089-FA2H     | ENSG00000137261-KIAA0319 | ENSG00000177294-FBXO39   | ENSG00000267580-CTD-2540B15.11 |
| ENSG00000104067-TJP1     | ENSG00000137628-DDX60    | ENSG00000177675-CD163L1  | ENSG00000269038-AP001462.6     |
| ENSG00000104626-ERI1     | ENSG00000137648-TMPRSS4  | ENSG00000178826-TMEM139  | ENSG00000269516-CYP4F23P       |
| ENSG00000104915-STX10    | ENSG00000137709-POU2F3   | ENSG00000178980-SEPW1    | ENSG00000272079-LA16c-380H5.5  |
| ENSG00000104953-TLE6     | ENSG00000138152-BTBD16   | ENSG00000179023-KLHDC7A  | ENSG00000272327-RP11-1002K11.1 |
| ENSG00000105357-MYH14    | ENSG00000138496-PARP9    | ENSG00000180316-PNPLA1   | ENSG00000273997-RP11-361F15.5  |
| ENSG00000105379-ETFB     | ENSG00000138642-HERC6    | ENSG00000181830-SLC35C1  | ENSG00000274002-RP11-66N24.6   |
| ENSG00000105409-ATP1A3   | ENSG00000139433-GLTP     | ENSG00000183486-MX2      | ENSG00000274356-RP11-216L13.21 |
| ENSG00000105520-LPPR2    | ENSG00000139725-RHOF     | ENSG00000183778-B3GALT5  | ENSG00000274415-RP11-433J22.2  |
| ENSG00000105640-RPL18A   | ENSG00000140459-CYP11A1  | ENSG00000184232-OAF      | ENSG00000275371-RP11-455F5.6   |
| ENSG00000105655-ISYNA1   | ENSG00000142973-CYP4B1   | ENSG00000184408-KCND2    | ENSG00000275430-MUC20          |
| ENSG00000107882-SUFU     | ENSG00000143412-ANXA9    | ENSG00000185432-METTL7A  | ENSG00000275896-PRSS3P2        |
| ENSG00000110080-ST3GAL4  | ENSG00000148175-STOM     | ENSG00000185442-FAM174B  | ENSG00000279457-FO538757.2     |
| ENSG00000110400-PVRL1    | ENSG00000149428-HYOU1    | ENSG00000185745-IFIT1    |                                |
| ENSG00000111319-SCNN1A   | ENSG00000156299-TIAM1    | ENSG00000186350-RXRA     |                                |
| ENSG00000111341-MGP      | ENSG00000156381-ANKRD9   | ENSG00000186470-BTN3A2   |                                |
| ENSG00000111863-ADTRP    | ENSG00000156711-MAPK13   | ENSG00000186480-INSIG1   |                                |
| ENSG00000111885-MAN1A1   | ENSG00000157601-MX1      | ENSG00000188641-DPYD     |                                |
| ENSG00000112149-CD83     | ENSG00000158106-RHPN1    | ENSG00000196188-CTSE     |                                |
| ENSG00000115107-STEAP3   | ENSG00000158555-GDPD5    | ENSG00000196205-EEF1A1P5 |                                |
| ENSG00000115648-MLPH     | ENSG00000159921-GNE      | ENSG00000196743-GM2A     |                                |
| ENSG00000116133-DHCR24   | ENSG00000161381-PLXDC1   | ENSG00000198569-SLC34A3  |                                |
| ENSG00000116525-TRIM62   | ENSG00000162496-DHRS3    | ENSG00000198846-TOX      |                                |

### 3) Genes uniquely upregulated in 5637 cells following rosiglitazone treatment

ENSG00000064042-LIMCH1  
ENSG00000102760-RGCC  
ENSG00000107295-SH3GL2  
ENSG00000115008-IL1A  
ENSG00000119630-PGF  
ENSG00000119986-AVPI1  
ENSG00000120899-PTK2B  
ENSG00000121769-FABP3  
ENSG00000131459-GFPT2  
ENSG00000137672-TRPC6  
ENSG00000138356-AOX1  
ENSG00000147027-TMEM47  
ENSG00000148053-NTRK2  
ENSG00000162511-LAPTM5  
ENSG00000165300-SLITRK5  
ENSG00000165424-ZCCHC24  
ENSG00000166401-SERPINB8  
ENSG00000175592-FOSL1  
ENSG00000197646-PDCD1LG2  
ENSG00000203877-RIPPLY2  
ENSG00000207652-MIR621  
ENSG00000257660-RP11-579D7.4  
ENSG00000277585-AC239646.1  
ENSG00000279469-RP11-215P8.2  
ENSG00000279806-RP11-58O9.2

#### 4) Genes upregulated in common in both UMUC1 and SW780 cells following rosiglitazone treatment

|                          |                         |                           |                                |
|--------------------------|-------------------------|---------------------------|--------------------------------|
| ENSG00000002549-LAP3     | ENSG00000111684-LPCAT3  | ENSG00000152766-ANKRD22   | ENSG00000187608-ISG15          |
| ENSG00000004799-PDK4     | ENSG00000112699-GMDS    | ENSG00000152778-IFIT5     | ENSG00000188293-IGFL1          |
| ENSG00000007944-MYLIP    | ENSG00000112902-SEMA5A  | ENSG00000153292-GPR110    | ENSG00000189120-SP6            |
| ENSG00000008394-MGST1    | ENSG00000113811-SELK    | ENSG00000153574-RPIA      | ENSG00000189221-MAOA           |
| ENSG00000016402-IL20RA   | ENSG00000114023-FAM162A | ENSG00000154102-C16orf74  | ENSG00000196154-S100A4         |
| ENSG000000021300-PLEKHB1 | ENSG00000114638-UPK1B   | ENSG00000154229-PRKCA     | ENSG00000197142-ACSL5          |
| ENSG00000023330-ALAS1    | ENSG00000115267-IFIH1   | ENSG00000154822-PLCL2     | ENSG00000197191-CYSRT1         |
| ENSG00000051523-CYBA     | ENSG00000115525-ST3GAL5 | ENSG00000155269-GPR78     | ENSG00000197562-RAB40C         |
| ENSG00000054179-ENTPD2   | ENSG00000116260-QSOX1   | ENSG00000155380-SLC16A1   | ENSG00000197872-FAM49A         |
| ENSG00000058668-ATP2B4   | ENSG00000116574-RHOU    | ENSG00000158292-GPR153    | ENSG00000198074-AKR1B10        |
| ENSG00000062282-DGAT2    | ENSG00000116990-MYCL    | ENSG00000158715-SLC45A3   | ENSG00000198113-TOR4A          |
| ENSG00000063241-ISOC2    | ENSG00000117984-CTSD    | ENSG00000158786-PLA2G2F   | ENSG00000198246-SPLC9A3        |
| ENSG00000066322-ELOVL1   | ENSG00000118777-ABCG2   | ENSG00000160179-ABCG1     | ENSG00000204991-SPICE2         |
| ENSG00000073737-DHRS9    | ENSG00000119899-SLC17A5 | ENSG00000161677-JOSD2     | ENSG00000205488-CALML3-AS1     |
| ENSG00000075213-SEMA3A   | ENSG00000121578-B4GALT4 | ENSG00000162069-CCDC64B   | ENSG00000214796-RP11-480I2.5   |
| ENSG00000075223-SEMA3C   | ENSG00000121691-CAT     | ENSG00000162545-CAMK2N1   | ENSG00000223532-HLA-B          |
| ENSG00000077942-FBLN1    | ENSG00000122971-ACADS   | ENSG00000162636-FAM102B   | ENSG00000223572-CKMT1A         |
| ENSG00000082074-FYB      | ENSG00000123095-BHLHE41 | ENSG00000162877-PM20D1    | ENSG00000224081-LINC01057      |
| ENSG00000083123-BCKDHB   | ENSG00000124215-CDH26   | ENSG00000163220-S100A9    | ENSG00000227066-RP3-340N1.2    |
| ENSG00000084444-KIAA1467 | ENSG00000124299-PEPD    | ENSG00000163739-CXCL1     | ENSG00000233461-RP11-295G20.2  |
| ENSG00000085662-AKR1B1   | ENSG00000124334-IL9P    | ENSG00000163993-S100P     | ENSG00000237522-NONOP2         |
| ENSG00000085741-WNT11    | ENSG00000124466-LYPD3   | ENSG00000164120-HPGD      | ENSG00000243566-UPK3B          |
| ENSG00000087076-HSD17B14 | ENSG00000125508-SRMS    | ENSG00000164300-SERINC5   | ENSG00000246705-H2AFJ          |
| ENSG00000088340-FER1L4   | ENSG00000126709-IFI6    | ENSG00000164342-TLR3      | ENSG00000260328-RP11-416I2.1   |
| ENSG00000088386-SLC15A1  | ENSG00000127329-PTPRB   | ENSG00000164626-KCNK5     | ENSG00000260604-RP11-140K8.5   |
| ENSG00000089356-FXYD3    | ENSG00000128311-TST     | ENSG00000166347-CYB5A     | ENSG00000260822-GS1-358P8.4    |
| ENSG00000090238-YPEL3    | ENSG00000131061-ZNF341  | ENSG00000166821-PEX11A    | ENSG00000260855-RP11-439E19.10 |
| ENSG00000099194-SCD      | ENSG00000132677-RHBG    | ENSG00000167114-SLC27A4   | ENSG00000261371-PECAM1         |
| ENSG00000100075-SLC25A1  | ENSG00000132698-RAB25   | ENSG00000167653-PSCA      | ENSG00000261888-AC144831.1     |
| ENSG00000100092-SH3BP1   | ENSG00000133135-RNF128  | ENSG00000169100-SLC25A6   | ENSG00000267259-CTD-2008P7.9   |
| ENSG00000100234-TIMP3    | ENSG00000134215-VAV3    | ENSG00000169583-CLIC3     | ENSG00000267795-SMIM22         |
| ENSG00000100280-AP1B1    | ENSG00000134317-GRHL1   | ENSG00000169605-GKN1      | ENSG00000274602-PI4KAP1        |
| ENSG00000100302-RASD2    | ENSG00000135218-CD36    | ENSG00000169635-HIC2      | ENSG00000275482-EPHB6          |
| ENSG00000100867-DHRS2    | ENSG00000135318-NT5E    | ENSG00000169692-AGPAT2    | ENSG00000278843-MMP28          |
| ENSG00000101210-EEF1A2   | ENSG00000135643-KCNMB4  | ENSG00000170522-ELOVL6    | ENSG00000279117-CTD-2562J17.6  |
| ENSG00000101213-PTK6     | ENSG00000135926-TMBIM1  | ENSG00000171159-C9orf16   | ENSG00000279406-RP11-327E2.5   |
| ENSG00000101347-SAMHD1   | ENSG00000136059-VILL    | ENSG00000171476-HOPX      |                                |
| ENSG00000101400-SNTA1    | ENSG00000137193-PIM1    | ENSG00000171813-PWWP2B    |                                |
| ENSG00000101439-CST3     | ENSG00000137486-ARRB1   | ENSG00000172889-EGFL7     |                                |
| ENSG00000101444-AHCY     | ENSG00000137745-MMP13   | ENSG00000173193-PARP14    |                                |
| ENSG00000101846-STS      | ENSG00000138207-RBP4    | ENSG00000173267-SNCG      |                                |
| ENSG00000102243-VGLL1    | ENSG00000138413-IDH1    | ENSG00000174327-SLC16A13  |                                |
| ENSG00000102879-CORO1A   | ENSG00000138798-EGF     | ENSG00000176387-HSD11B2   |                                |
| ENSG00000102886-GDPD3    | ENSG00000139318-DUSP6   | ENSG00000176454-LPCAT4    |                                |
| ENSG00000103044-HAS3     | ENSG00000139329-LUM     | ENSG00000176532-PRR15     |                                |
| ENSG00000104055-TGM5     | ENSG00000140374-ETFA    | ENSG00000179348-GATA2     |                                |
| ENSG00000105519-CAPS     | ENSG00000140479-PCSK6   | ENSG00000179604-CDC42EP4  |                                |
| ENSG00000105552-BCAT2    | ENSG00000141934-PPAP2C  | ENSG00000180176-TH        |                                |
| ENSG00000106123-EPHB6    | ENSG00000142623-PADI1   | ENSG00000180530-NRIP1     |                                |
| ENSG00000107104-KANK1    | ENSG00000142634-EFHD2   | ENSG00000180861-LINC01559 |                                |
| ENSG00000107201-DDX58    | ENSG00000142677-IL22RA1 | ENSG00000182606-TRAK1     |                                |
| ENSG00000107731-UNC5B    | ENSG00000143036-SLC44A3 | ENSG00000182749-PAQR7     |                                |
| ENSG00000107736-CDH23    | ENSG00000143333-RGS16   | ENSG00000184979-USP18     |                                |
| ENSG00000107738-C10orf54 | ENSG00000143653-SCCPDH  | ENSG00000185215-TNFAIP2   |                                |
| ENSG00000108639-SYNGR2   | ENSG00000143839-REN     | ENSG00000185753-Cxorf38   |                                |
| ENSG00000109625-CPZ      | ENSG00000147689-FAM83A  | ENSG00000185989-RASA3     |                                |
| ENSG00000110042-DTX4     | ENSG00000149925-ALDOA   | ENSG00000186197-EDARADD   |                                |
| ENSG00000110721-CHKA     | ENSG00000151715-TMEM45B | ENSG00000186204-CYP4F12   |                                |
| ENSG00000111261-MANSC1   | ENSG00000151726-ACSL1   | ENSG00000186212-SOWAHB    |                                |
| ENSG00000111331-OAS3     | ENSG00000152642-GPD1L   | ENSG00000186832-KRT16     |                                |

5) Genes upregulated in common in both SW780 and 5637 cells following rosiglitazone treatment

ENSG00000134668-SPOCD1  
ENSG00000137440-FGFBP1  
ENSG00000162391-FAM151A  
ENSG00000198142-SOWAHC  
ENSG00000221890-NPTXR

6) Genes upregulated in common in both UMUC1 and 5637 cells following rosiglitazone treatment

ENSG00000034152-MAP2K3  
ENSG00000070190-DAPP1  
ENSG00000072778-ACADVL  
ENSG00000105825-TFPI2  
ENSG00000109321-AREG  
ENSG00000110090-CPT1A  
ENSG00000111252-SH2B3  
ENSG00000113070-HBEGF  
ENSG00000113739-STC2  
ENSG00000120875-DUSP4  
ENSG00000123689-G0S2  
ENSG00000124882-EREG  
ENSG00000131015-ULBP2  
ENSG00000134070-IRAK2  
ENSG00000137962-ARHGAP29  
ENSG00000138623-SEMA7A  
ENSG00000139289-PHLDA1  
ENSG00000140450-ARRDC4  
ENSG00000159200-RCAN1  
ENSG00000163235-TGFA  
ENSG00000164690-SHH  
ENSG00000166016-ABTB2  
ENSG00000169252-ADRB2  
ENSG00000172216-CEBPB  
ENSG00000176659-C20orf197  
ENSG00000178726-THBD  
ENSG00000183691-NOG  
ENSG00000185668-POU3F1  
ENSG00000185950-IRS2  
ENSG00000189143-CLDN4  
ENSG00000189431-RASSF10  
ENSG00000221963-APOL6  
ENSG00000276851-RP5-875H18.9

7) Genes upregulated in common in UMUC1, SW780, and 5637 cells following rosiglitazone treatment

ENSG00000011422-PLAUR  
ENSG00000103187-COTL1  
ENSG00000112769-LAMA4  
ENSG00000124107-SLPI  
ENSG00000125538-IL1B  
ENSG00000128567-PODXL  
ENSG00000134240-HMGCS2  
ENSG00000136826-KLF4  
ENSG00000136869-TLR4  
ENSG00000142910-TINAGL1  
ENSG00000146072-TNFRSF21  
ENSG00000147872-PLIN2  
ENSG00000155368-DBI  
ENSG00000162390-ACOT11  
ENSG00000162645-GBP2  
ENSG00000163251-FZD5  
ENSG00000169429-CXCL8  
ENSG00000170323-FABP4  
ENSG00000170385-SLC30A1  
ENSG00000173890-GPR160  
ENSG00000176485-PLA2G16  
ENSG00000177076-ACER2  
ENSG00000179913-B3GNT3  
ENSG00000237330-RNF223  
ENSG00000260912-RP11-363E7.4  
ENSG00000276184-UPK3B

## 8) Genes uniquely downregulated in UMUC1 cells following rosiglitazone treatment

|                           |                          |                           |                          |
|---------------------------|--------------------------|---------------------------|--------------------------|
| ENSG0000001630-CYP51A1    | ENSG00000043039-BARX2    | ENSG00000074356-C17orf85  | ENSG00000088986-DYNLL1   |
| ENSG00000002586-CD99      | ENSG00000047644-WWC3     | ENSG00000074582-BCS1L     | ENSG00000089057-SLC23A2  |
| ENSG00000003096-KLHL13    | ENSG00000048342-CC2D2A   | ENSG00000074657-ZNF532    | ENSG00000089351-GRAMD1A  |
| ENSG00000003137-CYP26B1   | ENSG00000049618-ARID1B   | ENSG00000075218-GTSE1     | ENSG00000089558-KCNH4    |
| ENSG00000005108-THSD7A    | ENSG00000050405-LIMA1    | ENSG00000075407-ZNF37A    | ENSG00000089685-BIRC5    |
| ENSG00000005339-CREBBP    | ENSG00000053254-FOXN3    | ENSG00000075461-CACNG4    | ENSG00000090530-LEPREL1  |
| ENSG00000005448-WDR54     | ENSG00000054793-ATP9A    | ENSG00000076067-RBMS2     | ENSG00000090776-EFNB1    |
| ENSG00000005483-KMT2E     | ENSG00000054965-FAM168A  | ENSG00000076650-GPATCH1   | ENSG00000090861-AARS     |
| ENSG00000005882-PDK2      | ENSG00000057294-PKP2     | ENSG00000076706-MCAM      | ENSG00000090889-KIF4A    |
| ENSG00000006118-TMEM132A  | ENSG00000058804-NDC1     | ENSG00000077097-TOP2B     | ENSG00000090975-PITPNM2  |
| ENSG00000006327-TNFRSF12A | ENSG00000060688-SNRNP40  | ENSG00000077713-SLC25A43  | ENSG00000091129-NRCAM    |
| ENSG00000006530-AGK       | ENSG00000060982-BCAT1    | ENSG00000077782-FGFR1     | ENSG00000091483-FH       |
| ENSG00000006740-ARHGAP44  | ENSG00000063127-SLC6A16  | ENSG00000078043-PIAS2     | ENSG00000091622-PITPNM3  |
| ENSG00000007866-TEAD3     | ENSG00000063180-CA11     | ENSG00000078114-NEBL      | ENSG00000091651-ORC6     |
| ENSG00000007968-E2F2      | ENSG00000063587-ZNF275   | ENSG00000078177-N4BP2     | ENSG00000091656-ZFX4     |
| ENSG00000008256-CYTH3     | ENSG00000063601-MTMR1    | ENSG00000078237-C12orf5   | ENSG00000092068-SLC7A8   |
| ENSG00000009830-POMT2     | ENSG00000064393-HIPK2    | ENSG00000078900-TP73      | ENSG00000092094-OSGEP    |
| ENSG00000009950-MLXIPL    | ENSG00000064655-EYA2     | ENSG00000079215-SLC1A3    | ENSG00000092096-SLC22A17 |
| ENSG00000009954-BAZ1B     | ENSG00000064666-CNN2     | ENSG00000079308-TNS1      | ENSG00000092445-TYRO3    |
| ENSG00000010810-FYN       | ENSG00000064886-CHI3L2   | ENSG00000079432-CIC       | ENSG00000092621-PHGDH    |
| ENSG00000011028-MRC2      | ENSG00000064961-HMG20B   | ENSG00000079482-OPHN1     | ENSG00000092820-EZR      |
| ENSG00000011114-BTBD7     | ENSG00000065485-PDIA5    | ENSG00000079616-KIF22     | ENSG00000094804-CDC6     |
| ENSG00000011143-MKS1      | ENSG00000065618-COL17A1  | ENSG00000079785-DDX1      | ENSG00000094914-AAAS     |
| ENSG00000011201-KAL1      | ENSG00000065970-FOXJ2    | ENSG00000080345-RIF1      | ENSG00000095002-MSH2     |
| ENSG00000011275-RNF216    | ENSG00000066117-SMARCD1  | ENSG00000080546-SESN1     | ENSG00000095383-TBC1D2   |
| ENSG00000011347-SYT7      | ENSG00000066468-FGFR2    | ENSG00000080561-MID2      | ENSG00000095397-DFNB31   |
| ENSG00000011426-ANLN      | ENSG00000066697-SNSANTD3 | ENSG00000080839-RBL1      | ENSG00000095739-BAMBI    |
| ENSG00000011677-GABRA3    | ENSG00000067082-KLF6     | ENSG00000080986-NDC80     | ENSG00000095951-HIVEP1   |
| ENSG00000013297-CLDN11    | ENSG00000067141-NEO1     | ENSG00000081277-PKP1      | ENSG00000096696-DSP      |
| ENSG00000013306-SLC25A39  | ENSG00000067167-TRAM1    | ENSG00000081307-UBA5      | ENSG00000096746-HNRNPH3  |
| ENSG00000013441-CLK1      | ENSG00000067798-NAV3     | ENSG00000081320-STK17B    | ENSG00000099904-ZDHHC8   |
| ENSG00000013588-GPRC5A    | ENSG00000068438-FTSJ1    | ENSG00000081377-CDC14B    | ENSG00000099949-LZTR1    |
| ENSG00000014914-MTMR11    | ENSG00000068489-PRR11    | ENSG00000081721-DUSP12    | ENSG00000100033-PRODH    |
| ENSG00000019186-CYP24A1   | ENSG00000068784-SRBD1    | ENSG00000082068-WDR70     | ENSG00000100084-HIRA     |
| ENSG00000019485-PRDM11    | ENSG00000068976-PYGM     | ENSG00000083168-KAT6A     | ENSG00000100100-PIK3IP1  |
| ENSG00000020426-MNAT1     | ENSG00000069188-SDK2     | ENSG00000083290-ULK2      | ENSG00000100162-CENPM    |
| ENSG00000020577-SAMD4A    | ENSG00000069482-GAL      | ENSG00000084112-SSH1      | ENSG00000100228-RAB36    |
| ENSG00000021762-OSBPL5    | ENSG00000070614-NDST1    | ENSG00000084453-SLCO1A2   | ENSG00000100297-MCM5     |
| ENSG00000022976-ZNF839    | ENSG00000070718-AP3M2    | ENSG00000084774-CAD       | ENSG00000100311-PDGFB    |
| ENSG00000024422-EHD2      | ENSG00000070778-PTPN21   | ENSG00000086475-SEPHS1    | ENSG00000100350-FOXRED2  |
| ENSG00000024526-DEPDC1    | ENSG00000071054-MAP4K4   | ENSG00000086570-FAT2      | ENSG00000100379-KCTD17   |
| ENSG00000026025-VIM       | ENSG00000071967-CYBRD1   | ENSG00000087085-ACHE      | ENSG00000100393-EP300    |
| ENSG00000026559-KCNG1     | ENSG00000072864-NDE1     | ENSG00000087086-FTL       | ENSG00000100403-ZC3H7B   |
| ENSG00000027847-B4GALT7   | ENSG00000073111-MCM2     | ENSG00000087586-AURKA     | ENSG00000100485-SOS2     |
| ENSG00000029534-ANK1      | ENSG00000073282-TP63     | ENSG00000088305-DNMT3B    | ENSG00000100526-CDKN3    |
| ENSG00000029993-HMGB3     | ENSG00000073536-NLE1     | ENSG00000088325-TPX2      | ENSG00000100650-SRSF5    |
| ENSG00000034239-EFCAB1    | ENSG00000073712-FERMT2   | ENSG00000088538-DOCK3     | ENSG00000100711-ZFYVE21  |
| ENSG00000040608-RTN4R     | ENSG00000074047-GLI2     | ENSG00000088756-ARHGAP28  | ENSG00000100815-TRIP11   |
| ENSG00000041982-TNC       | ENSG00000074211-PPP2R2C  | ENSG00000088854-C20orf194 | ENSG00000100823-APEX1    |
| ENSG00000042832-TG        | ENSG00000074219-TEAD2    | ENSG00000088881-EBF4      | ENSG00000100852-ARHGAP5  |

Genes uniquely downregulated in UMUC1 cells following rosiglitazone treatment (continued)

|                          |                          |                          |                         |
|--------------------------|--------------------------|--------------------------|-------------------------|
| ENSG00000101003-GINS1    | ENSG00000106484-MEST     | ENSG00000112282-MED23    | ENSG00000117394-SLC2A1  |
| ENSG00000101057-MYBL2    | ENSG00000106571-GLI3     | ENSG00000112655-PTK7     | ENSG00000117399-CDC20   |
| ENSG00000101115-SALL4    | ENSG00000106603-COA1     | ENSG00000112658-SRF      | ENSG00000117411-B4GALT2 |
| ENSG00000101298-SNPH     | ENSG00000106628-POLD2    | ENSG00000112667-DNPH1    | ENSG00000117519-CNN3    |
| ENSG00000101363-MANBAL   | ENSG00000106692-FKTN     | ENSG00000112701-SENP6    | ENSG00000117543-DPH5    |
| ENSG00000101384-JAG1     | ENSG00000106799-TGFBR1   | ENSG00000112972-HMGCS1   | ENSG00000117595-IRF6    |
| ENSG00000101447-FAM83D   | ENSG00000106853-PTGR1    | ENSG00000112984-KIF20A   | ENSG00000117602-RCAN3   |
| ENSG00000101665-SMAD7    | ENSG00000107021-TBC1D13  | ENSG00000113140-SPARC    | ENSG00000117632-STMN1   |
| ENSG00000101825-MXRA5    | ENSG00000107249-GLIS3    | ENSG00000113272-THG1L    | ENSG00000117650-NEK2    |
| ENSG00000101868-POLA1    | ENSG00000107263-RAPGEF1  | ENSG00000113368-LMNB1    | ENSG00000117713-ARID1A  |
| ENSG00000101871-MID1     | ENSG00000107438-PDLIM1   | ENSG00000113369-ARRDC3   | ENSG00000117724-CENPF   |
| ENSG00000101882-NKAP     | ENSG00000107672-NSMCE4A  | ENSG00000113638-TTC33    | ENSG00000118193-KIF14   |
| ENSG00000102007-PLP2     | ENSG00000107745-MICU1    | ENSG00000113657-DPYSL3   | ENSG00000118217-ATF6    |
| ENSG00000102181-CD99L2   | ENSG00000107758-PPP3CB   | ENSG00000113758-DBN1     | ENSG00000118418-HMGN3   |
| ENSG00000102312-PORCN    | ENSG00000107862-GBF1     | ENSG00000113810-SMC4     | ENSG00000118482-PHF3    |
| ENSG00000102316-MAGED2   | ENSG00000108312-UBTF     | ENSG00000114279-FGF12    | ENSG00000118507-AKAP7   |
| ENSG00000102384-CENPI    | ENSG00000108349-CASC3    | ENSG00000114315-HES1     | ENSG00000118785-SPP1    |
| ENSG00000102466-FGF14    | ENSG00000108375-RNF43    | ENSG00000114744-COMMD2   | ENSG00000118816-CCNI    |
| ENSG00000102898-NUTF2    | ENSG00000108468-CBX1     | ENSG00000114861-FOXP1    | ENSG00000118898-PPL     |
| ENSG00000102974-CTCF     | ENSG00000108654-DDX5     | ENSG00000114923-SLC4A3   | ENSG00000118922-KLF12   |
| ENSG00000103021-CCDC113  | ENSG00000108666-C17orf75 | ENSG00000114993-RTKN     | ENSG00000119004-CYP20A1 |
| ENSG00000103202-NME4     | ENSG00000108953-YWHAE    | ENSG00000114999-TTL      | ENSG00000119042-SATB2   |
| ENSG00000103257-SLC7A5   | ENSG00000109089-CDR2L    | ENSG00000115129-TP53I3   | ENSG00000119397-CNTRL   |
| ENSG00000103351-CLUAP1   | ENSG00000109458-GAB1     | ENSG00000115155-OTOF     | ENSG00000119403-PHF19   |
| ENSG00000103404-USP31    | ENSG00000109610-SOD3     | ENSG00000115183-TANC1    | ENSG00000119514-GALNT12 |
| ENSG00000103479-RBL2     | ENSG00000109670-FBXW7    | ENSG00000115306-SPTBN1   | ENSG00000119688-ABCD4   |
| ENSG00000103852-TTC23    | ENSG00000109680-TBC1D19  | ENSG00000115355-CCDC88A  | ENSG00000119707-RBM25   |
| ENSG00000103994-ZNF106   | ENSG00000109685-WHSC1    | ENSG00000115361-ACADL    | ENSG00000119787-ATL2    |
| ENSG00000104064-GABPB1   | ENSG00000109805-NCAPG    | ENSG00000115368-WDR75    | ENSG00000119866-BCL11A  |
| ENSG00000104081-BMF      | ENSG00000109881-CCDC34   | ENSG00000115594-IL1R1    | ENSG00000119900-OGFRL1  |
| ENSG00000104341-LAPTM4B  | ENSG00000110066-SUV420H1 | ENSG00000115596-WNT6     | ENSG00000119938-PPP1R3C |
| ENSG00000104368-PLAT     | ENSG00000110092-CCND1    | ENSG00000115694-STK25    | ENSG00000120327-PCDHB14 |
| ENSG00000104635-SLC39A14 | ENSG00000110108-TMEM109  | ENSG00000115718-PROC     | ENSG00000120708-TGFBI   |
| ENSG00000104679-R3HCC1   | ENSG00000110315-RNF141   | ENSG00000115738-ID2      | ENSG00000120798-NR2C1   |
| ENSG00000104852-SNRNP70  | ENSG00000110328-GALNT18  | ENSG00000115758-ODC1     | ENSG00000120802-TMPO    |
| ENSG00000104880-ARHGEF18 | ENSG00000110497-AMBRA1   | ENSG00000115828-QPCT     | ENSG00000120805-ARL1    |
| ENSG00000104892-KLC3     | ENSG00000110880-CORO1C   | ENSG00000115844-DLX2     | ENSG00000120820-GLT8D2  |
| ENSG00000105011-ASF1B    | ENSG00000110987-BCL7A    | ENSG00000115993-TRAK2    | ENSG00000120837-NFYB    |
| ENSG00000105088-OLFM2    | ENSG00000111665-CDCA3    | ENSG00000116017-ARID3A   | ENSG00000120896-SORBS3  |
| ENSG00000105419-MEIS3    | ENSG00000111666-CHPT1    | ENSG00000116044-NFE2L2   | ENSG00000121152-NCAPH   |
| ENSG00000105426-PTPRS    | ENSG00000111670-GNPTAB   | ENSG00000116560-SFPQ     | ENSG00000121316-PLBD1   |
| ENSG00000105429-MEGF8    | ENSG00000111817-DSE      | ENSG00000116667-C1orf21  | ENSG00000121621-KIF18A  |
| ENSG00000105722-ERF      | ENSG00000111859-NEDD9    | ENSG00000116679-IVNS1ABP | ENSG00000122140-MRPS2   |
| ENSG00000105810-CDK6     | ENSG00000111875-ASF1A    | ENSG00000116729-WLS      | ENSG00000122386-ZNF205  |
| ENSG00000105880-DLX5     | ENSG00000111913-FAM65B   | ENSG00000116741-RGS2     | ENSG00000122592-HOXA7   |
| ENSG00000105928-DFNA5    | ENSG00000112078-KCTD20   | ENSG00000117000-RLF      | ENSG00000122644-ARL4A   |
| ENSG00000105948-TTC26    | ENSG00000112079-STK38    | ENSG00000117122-MFAP2    | ENSG00000122694-GLIPR2  |
| ENSG00000105976-MET      | ENSG00000112081-SRSF3    | ENSG00000117155-SSX2IP   | ENSG00000122779-TRIM24  |
| ENSG00000106290-TAF6     | ENSG00000112118-MCM3     | ENSG00000117174-ZNHIT6   | ENSG00000122786-CALD1   |
| ENSG00000106462-EZH2     | ENSG00000112139-MDGA1    | ENSG00000117305-HMGCL    | ENSG00000122877-EGR2    |



Genes uniquely downregulated in UMUC1 cells following rosiglitazone treatment (continued)

|                          |                          |                          |                           |
|--------------------------|--------------------------|--------------------------|---------------------------|
| ENSG00000122952-ZWINT    | ENSG00000128805-ARHGAP22 | ENSG00000134202-GSTM3    | ENSG00000136854-STXBP1    |
| ENSG00000122966-CIT      | ENSG00000128872-TMOD2    | ENSG00000134222-PSRC1    | ENSG00000136856-SLC2A8    |
| ENSG00000123080-CDKN2C   | ENSG00000129038-LOXL1    | ENSG00000134250-NOTCH2   | ENSG00000136870-ZNF189    |
| ENSG00000123130-ACOT9    | ENSG00000129173-E2F8     | ENSG00000134253-TRIM45   | ENSG00000136938-ANP32B    |
| ENSG00000123201-GUCY1B2  | ENSG00000129195-FAM64A   | ENSG00000134258-VTCN1    | ENSG00000136943-CTSV      |
| ENSG00000123219-CENPK    | ENSG00000129646-QRICH2   | ENSG00000134308-YWHAQ    | ENSG00000136997-MYC       |
| ENSG00000123364-HOXC13   | ENSG00000129810-SGOL1    | ENSG00000134324-LPIN1    | ENSG00000137177-KIF13A    |
| ENSG00000123384-LRP1     | ENSG00000130005-GAMT     | ENSG00000134463-ECHDC3   | ENSG00000137203-TFAP2A    |
| ENSG00000123411-IKZF4    | ENSG00000130147-SH3BP4   | ENSG00000134504-KCTD1    | ENSG00000137266-SLC22A23  |
| ENSG00000123472-ATPAF1   | ENSG00000130270-ATP8B3   | ENSG00000134569-LRP4     | ENSG00000137273-SMXF2     |
| ENSG00000123485-HJURP    | ENSG00000130299-GTPBP3   | ENSG00000134574-DBB2     | ENSG00000137547-MRPL15    |
| ENSG00000124098-FAM210B  | ENSG00000130584-ZBTB46   | ENSG00000134690-CDC48    | ENSG00000137693-YAP1      |
| ENSG00000124145-SDC4     | ENSG00000130595-TNNT3    | ENSG00000134744-ZCCHC11  | ENSG00000137760-ALKBH8    |
| ENSG00000124177-CHD6     | ENSG00000130635-COL5A1   | ENSG00000134760-DSG1     | ENSG00000137804-NUSAP1    |
| ENSG00000124193-SRSF6    | ENSG00000130684-ZNF337   | ENSG00000134762-DSC3     | ENSG00000137807-KIF23     |
| ENSG00000124212-PTGIS    | ENSG00000130726-TRIM28   | ENSG00000134827-TCN1     | ENSG00000137812-CASC5     |
| ENSG00000124226-RNF114   | ENSG00000131016-AKAP12   | ENSG00000135249-RINT1    | ENSG00000137831-UACA      |
| ENSG00000124243-BCAS4    | ENSG00000131023-LATS1    | ENSG00000135299-ANKRD6   | ENSG00000137834-SMXD6     |
| ENSG00000124608-AARS2    | ENSG00000131043-AAR2     | ENSG00000135362-PRR5L    | ENSG00000137942-FNBP1L    |
| ENSG00000124702-KLHDC3   | ENSG00000131269-ABC7     | ENSG00000135365-PHF21A   | ENSG00000137968-SLC44A5   |
| ENSG00000124766-SOX4     | ENSG00000131323-TRAF3    | ENSG00000135378-PRRG4    | ENSG00000138160-KIF11     |
| ENSG00000124789-NUP153   | ENSG00000131747-TOP2A    | ENSG00000135390-ATP5G2   | ENSG00000138180-CEP55     |
| ENSG00000124795-DEK      | ENSG00000131788-PIAS3    | ENSG00000135451-TROAP    | ENSG00000138271-GPR87     |
| ENSG00000125166-GOT2     | ENSG00000131791-PRKAB2   | ENSG00000135469-COQ10A   | ENSG00000138336-TET1      |
| ENSG00000125354-SEPT6    | ENSG00000131845-ZNF304   | ENSG00000135476-ESPL1    | ENSG00000138411-HECW2     |
| ENSG00000125355-TMEM255A | ENSG00000131885-KRT17P1  | ENSG00000135503-ACVR1B   | ENSG00000138641-HERC3     |
| ENSG00000125378-BMP4     | ENSG00000132153-DHX30    | ENSG00000135596-MICAL1   | ENSG00000138663-COPS4     |
| ENSG00000125484-GTF3C4   | ENSG00000132275-RRP8     | ENSG00000135622-SEMA4F   | ENSG00000138696-BMPR1B    |
| ENSG00000125648-SLC25A23 | ENSG00000132329-RAMP1    | ENSG00000135624-CCT7     | ENSG00000138767-CNOT6L    |
| ENSG00000125845-BMP2     | ENSG00000132359-RAP1GAP2 | ENSG00000135625-EGR4     | ENSG00000138772-ANXA3     |
| ENSG00000125863-MKKS     | ENSG00000132423-COQ3     | ENSG00000135736-CCDC102A | ENSG00000138835-RGS3      |
| ENSG00000126216-TUBGCP3  | ENSG00000132563-REEP2    | ENSG00000135775-COG2     | ENSG00000139044-B4GALNT3  |
| ENSG00000126262-FFAR2    | ENSG00000132591-ERAL1    | ENSG00000135821-GLUL     | ENSG00000139144-PIK3C2G   |
| ENSG00000126391-FRMD8    | ENSG00000132640-BTBD3    | ENSG00000135823-STX6     | ENSG00000139154-AEBP2     |
| ENSG00000126583-PRKCG    | ENSG00000132646-PCNA     | ENSG00000135925-WNT10A   | ENSG00000139174-PRICKLE1  |
| ENSG00000126777-KTN1     | ENSG00000132688-NES      | ENSG00000135931-ARMC9    | ENSG00000139324-TMTC3     |
| ENSG00000126787-DLGAP5   | ENSG00000132915-PDE6A    | ENSG00000136026-CKAP4    | ENSG00000139496-NUPL1     |
| ENSG00000127152-BCL11B   | ENSG00000132967-HMGB1P5  | ENSG00000136098-NEK3     | ENSG00000139505-MTMR6     |
| ENSG00000127334-DYRK2    | ENSG00000133059-DSTYK    | ENSG00000136108-CKAP2    | ENSG00000139514-SLC7A1    |
| ENSG00000127586-CHTF18   | ENSG00000133067-LGR6     | ENSG00000136155-SCEL     | ENSG00000139517-LNX2      |
| ENSG00000127922-SHFM1    | ENSG00000133138-TBC1D8B  | ENSG00000136161-RCBTB2   | ENSG00000139546-TARBP2    |
| ENSG00000128185-DGCR6L   | ENSG00000133678-TMEM254  | ENSG00000136235-GPNMB    | ENSG00000139675-HNRNPA1L2 |
| ENSG00000128191-DGCR8    | ENSG00000133703-KRAS     | ENSG00000136240-KDELRL2  | ENSG00000139718-SETD1B    |
| ENSG00000128272-ATF4     | ENSG00000133710-SPINK5   | ENSG00000136319-TTC5     | ENSG00000139832-RAB20     |
| ENSG00000128422-KRT17    | ENSG00000133985-TTC9     | ENSG00000136463-TACO1    | ENSG00000139835-GRTP1     |
| ENSG00000128581-IFT22    | ENSG00000134057-CCNB1    | ENSG00000136492-BRIP1    | ENSG00000139880-CDH24     |
| ENSG00000128602-SMO      | ENSG00000134107-BHLHE40  | ENSG00000136527-TRA2B    | ENSG00000139926-FRMD6     |
| ENSG00000128609-NDUFA5   | ENSG00000134138-MEIS2    | ENSG00000136603-SKIL     | ENSG00000140022-STON2     |
| ENSG00000128710-HOXD10   | ENSG00000134146-DPH6     | ENSG00000136636-KCTD3    | ENSG00000140044-JDP2      |
| ENSG00000128714-HOXD13   | ENSG00000134198-TSPAN2   | ENSG00000136695-IL36RN   | ENSG00000140092-FBLN5     |

Genes uniquely downregulated in UMUC1 cells following rosiglitazone treatment (continued)

|                          |                          |                          |                          |
|--------------------------|--------------------------|--------------------------|--------------------------|
| ENSG00000140332-TLE3     | ENSG00000144647-POMGNT2  | ENSG00000149948-HMGA2    | ENSG00000157216-SSBP3    |
| ENSG00000140382-HMG20A   | ENSG00000144655-CSRNP1   | ENSG00000150347-ARID5B   | ENSG00000157240-FZD1     |
| ENSG00000140391-TSPAN3   | ENSG00000144677-CTDSP1   | ENSG00000150403-TMCO3    | ENSG00000157326-DHRS4    |
| ENSG00000140416-TPM1     | ENSG00000144724-PTPRG    | ENSG00000150433-TMEM218  | ENSG00000157557-ETS2     |
| ENSG00000140511-HAPLN3   | ENSG00000145284-SCD5     | ENSG00000150457-LATS2    | ENSG00000157657-ZNF618   |
| ENSG00000140534-TICRR    | ENSG00000145386-CCNA2    | ENSG00000150471-LPHN3    | ENSG00000157796-WDR19    |
| ENSG00000140682-TGFB11   | ENSG00000145687-SSBP2    | ENSG00000150551-LYPD1    | ENSG00000158023-WDR66    |
| ENSG00000140688-C16orf58 | ENSG00000145703-IQGAP2   | ENSG00000150556-LYPD6B   | ENSG00000158163-DZIP1L   |
| ENSG00000140836-ZFH3     | ENSG00000145934-TENM2    | ENSG00000150667-FSIP1    | ENSG00000158186-MRAS     |
| ENSG00000140848-CPNE2    | ENSG00000146197-SCUBE3   | ENSG00000150687-PRSS23   | ENSG00000158234-FAIM     |
| ENSG00000140948-ZCCHC14  | ENSG00000146247-PHIP     | ENSG00000150722-PPP1R1C  | ENSG00000158301-GPRASP2  |
| ENSG00000140995-DEF8     | ENSG00000146281-PM20D2   | ENSG00000150760-DOCK1    | ENSG00000158825-CDA      |
| ENSG00000141376-BCAS3    | ENSG00000146674-IGFBP3   | ENSG00000151135-TMEM263  | ENSG00000159055-MIS18A   |
| ENSG00000141384-TAF4B    | ENSG00000146676-PURB     | ENSG00000151468-CCDC3    | ENSG00000159164-SV2A     |
| ENSG00000141447-OSBPL1A  | ENSG00000146802-TMEM168  | ENSG00000151491-EPS8     | ENSG00000159202-UBF2Z    |
| ENSG00000141560-FN3KRP   | ENSG00000146858-ZC3HAV1L | ENSG00000151552-QDPR     | ENSG00000159228-CBR1     |
| ENSG00000141682-PMAP1    | ENSG00000146950-SHROOM2  | ENSG00000151718-WWC2     | ENSG00000159335-PTMS     |
| ENSG00000141696-LEPREL4  | ENSG00000147050-KDM6A    | ENSG00000151835-SACS     | ENSG00000159445-THEM4    |
| ENSG00000141837-CACNA1A  | ENSG00000147099-HDAC8    | ENSG00000151876-FBXO4    | ENSG00000159840-ZYX      |
| ENSG00000141858-SAMD1    | ENSG00000147130-ZMYM3    | ENSG00000151914-DST      | ENSG00000160062-ZBTB8A   |
| ENSG00000142102-ATHL1    | ENSG00000147155-EBP      | ENSG00000152076-CCDC74B  | ENSG00000160145-KALRN    |
| ENSG00000142178-SIK1     | ENSG00000147274-RBMX     | ENSG00000152229-PSTPIP2  | ENSG00000160201-U2AF1    |
| ENSG00000142279-WTIP     | ENSG00000147400-CETN2    | ENSG00000152284-TCF7L1   | ENSG00000160207-HSF2BP   |
| ENSG00000142305-NLRP12   | ENSG00000147403-RPL10    | ENSG00000152484-USP12    | ENSG00000160445-ZER1     |
| ENSG00000142632-ARHGEF19 | ENSG00000147509-RGS20    | ENSG00000152520-PAN3     | ENSG00000161542-PRPSAP1  |
| ENSG00000142765-SYTL1    | ENSG00000147789-ZNF7     | ENSG00000152582-SPEF2    | ENSG00000161544-CYGB     |
| ENSG00000143013-LMO4     | ENSG00000147862-NFIB     | ENSG00000152779-SLC16A12 | ENSG00000161642-ZNF385A  |
| ENSG00000143067-ZNF697   | ENSG00000147883-CDKN2B   | ENSG00000152782-PANK1    | ENSG00000161682-FAM171A2 |
| ENSG00000143147-GPR161   | ENSG00000148120-C9orf3   | ENSG00000153044-CENPH    | ENSG00000161692-DBF4B    |
| ENSG00000143157-POGK     | ENSG00000148225-WDR31    | ENSG00000153071-DAB2     | ENSG00000161800-RACGAP1  |
| ENSG00000143217-PVRL4    | ENSG00000148337-CIZ1     | ENSG00000153246-PLA2R1   | ENSG00000162063-CCNF     |
| ENSG00000143320-CRABP2   | ENSG00000148384-INPP5E   | ENSG00000153294-GPR115   | ENSG00000162444-RBP7     |
| ENSG00000143341-HMCN1    | ENSG00000148400-NOTCH1   | ENSG00000153317-ASAP1    | ENSG00000162512-SDC3     |
| ENSG00000143344-RGL1     | ENSG00000148411-NACC2    | ENSG00000153896-ZNF599   | ENSG00000162552-WNT4     |
| ENSG00000143442-POGZ     | ENSG00000148429-USP6NL   | ENSG00000154040-CABYR    | ENSG00000162607-USP1     |
| ENSG00000143486-EIF2D    | ENSG00000148680-HTR7     | ENSG00000154146-NRGN     | ENSG00000162613-FUBP1    |
| ENSG00000143502-SUSD4    | ENSG00000148737-TCF7L2   | ENSG00000154217-PITPNC1  | ENSG00000162702-ZNF281   |
| ENSG00000143515-ATP8B2   | ENSG00000149136-SSRP1    | ENSG00000154359-LONRF1   | ENSG00000162714-ZNF496   |
| ENSG00000143753-DEGS1    | ENSG00000149177-PTPRJ    | ENSG00000154856-APCDD1   | ENSG00000162772-ATF3     |
| ENSG00000143889-HNRNPLL  | ENSG00000149212-SESN3    | ENSG00000154930-ACSS1    | ENSG00000163032-VSNL1    |
| ENSG00000143891-GALM     | ENSG00000149269-PAK1     | ENSG00000154945-ANKRD40  | ENSG00000163040-CCDC74A  |
| ENSG00000143924-EML4     | ENSG00000149292-TTC12    | ENSG00000155252-PI4K2A   | ENSG00000163050-ADCK3    |
| ENSG00000143952-VPS54    | ENSG00000149474-CSR2BP   | ENSG00000155287-SLC25A28 | ENSG00000163069-SGCB     |
| ENSG00000144043-TEX261   | ENSG00000149547-EI24     | ENSG00000155629-PIK3AP1  | ENSG00000163071-SPATA18  |
| ENSG00000144120-TMEM177  | ENSG00000149577-SIDT2    | ENSG00000156162-DPY19L4  | ENSG00000163093-BBS5     |
| ENSG00000144283-PKP4     | ENSG00000149582-TMEM25   | ENSG00000156218-ADAMTSL3 | ENSG00000163141-BNIPL    |
| ENSG00000144354-CDCA7    | ENSG00000149600-COMMD7   | ENSG00000156970-BUB1B    | ENSG00000163170-BOLA3    |
| ENSG00000144476-ACKR3    | ENSG00000149639-SOGA1    | ENSG00000156976-EIF4A2   | ENSG00000163171-CDC42EP3 |
| ENSG00000144579-CTDSP1   | ENSG00000149679-CABLES2  | ENSG00000157214-STEAP2   | ENSG00000163191-S100A11  |
| ENSG00000144642-RBMS3    | ENSG00000149823-VPS51    |                          |                          |

Genes uniquely downregulated in UMUC1 cells following rosiglitazone treatment (continued)

|                          |                          |                               |                            |
|--------------------------|--------------------------|-------------------------------|----------------------------|
| ENSG00000163293-NIPAL1   | ENSG00000165621-OXGR1    | ENSG00000168785-TSPAN5        | ENSG00000172578-KLHL6      |
| ENSG00000163331-DAPL1    | ENSG00000165660-FAM175B  | ENSG00000168918-INPP5D        | ENSG00000173068-BNC2       |
| ENSG00000163406-SLC15A2  | ENSG00000165685-TMEM52B  | ENSG00000168928-CTRB2         | ENSG00000173198-CYSLTR1    |
| ENSG00000163430-FSTL1    | ENSG00000165724-ZMYND19  | ENSG00000168952-STXBP6        | ENSG00000173262-SLC2A14    |
| ENSG00000163453-IGFBP7   | ENSG00000165821-SALL2    | ENSG00000169018-FEM1B         | ENSG00000173276-ZBTB21     |
| ENSG00000163629-PTPN13   | ENSG00000165891-E2F7     | ENSG00000169047-IRS1          | ENSG00000173391-OLR1       |
| ENSG00000163634-THOC7    | ENSG00000165905-GYLTL1B  | ENSG00000169067-ACTBL2        | ENSG00000173517-PEAK1      |
| ENSG00000163635-ATXN7    | ENSG00000165959-CLMN     | ENSG00000169093-ASMTL         | ENSG00000173575-CHD2       |
| ENSG00000163637-PRICKLE2 | ENSG00000166068-SPRED1   | ENSG00000169174-PCSK9         | ENSG00000173805-HAP1       |
| ENSG00000163701-IL17RE   | ENSG00000166106-ADAMTS15 | ENSG00000169184-MN1           | ENSG00000173846-FLK3       |
| ENSG00000163702-IL17RC   | ENSG00000166130-IKBIP    | ENSG00000169242-EFNA1         | ENSG00000174080-CTSF       |
| ENSG00000163710-PCOLCE2  | ENSG00000166333-ILK      | ENSG00000169607-CKAP2L        | ENSG00000174099-MSRB3      |
| ENSG00000163818-LZTFL1   | ENSG00000166352-C11orf74 | ENSG00000169679-BUB1          | ENSG00000174365-SNHG11     |
| ENSG00000163820-FYCO1    | ENSG00000166483-WEE1     | ENSG00000169714-CNBP          | ENSG00000174640-SLCO2A1    |
| ENSG00000163823-CCR1     | ENSG00000166526-ZNF3     | ENSG00000169718-DUS1L         | ENSG00000174721-FGFBP3     |
| ENSG00000163867-ZMYM6    | ENSG00000166532-RIMKLB   | ENSG00000169740-ZNF32         | ENSG00000174799-CEP135     |
| ENSG00000163909-HEYL     | ENSG00000166546-BEAN1    | ENSG00000169884-WNT10B        | ENSG00000174891-RSRC1      |
| ENSG00000164002-EXO5     | ENSG00000166788-ADAMTS15 | ENSG00000169894-MUC3A         | ENSG00000174989-FBXW8      |
| ENSG00000164056-SPRY1    | ENSG00000166833-NAV2     | ENSG00000169908-TM4SF1        | ENSG00000175130-MARCKSL1   |
| ENSG00000164080-RAD54L2  | ENSG00000166839-ANKDD1A  | ENSG00000170293-CMTM8         | ENSG00000175215-CTDSP2     |
| ENSG00000164125-FAM198B  | ENSG00000166851-PLK1     | ENSG00000170312-CDK1          | ENSG00000175221-MED16      |
| ENSG00000164151-ICE1     | ENSG00000166860-ZBTB39   | ENSG00000170421-KRT8          | ENSG00000175279-APITD1     |
| ENSG00000164167-LSM6     | ENSG00000166869-CHP2     | ENSG00000170464-DNAJC18       | ENSG00000175445-LPL        |
| ENSG00000164211-STARD4   | ENSG00000166979-EVA1C    | ENSG00000170465-KRT6C         | ENSG00000175548-ALG10B     |
| ENSG00000164236-ANKRD33B | ENSG00000167081-PBX3     | ENSG00000170484-KRT74         | ENSG00000175581-MRPL48     |
| ENSG00000164237-CMBL     | ENSG00000167123-CERCAM   | ENSG00000170579-DLGAP1        | ENSG00000175643-RMI2       |
| ENSG00000164411-GJB7     | ENSG00000167595-PROSER3  | ENSG00000170779-CDCA4         | ENSG00000175806-MSRA       |
| ENSG00000164414-SLC35A1  | ENSG00000167600-CYP2S1   | ENSG00000170871-KIAA0232      | ENSG00000175873-AC004840.9 |
| ENSG00000164506-STXBP5   | ENSG00000167615-LENG8    | ENSG00000170955-PRKCDBP       | ENSG00000175879-HOXD8      |
| ENSG00000164548-TRA2A    | ENSG00000167645-YIF1B    | ENSG00000171206-TRIM8         | ENSG00000176046-NUPR1      |
| ENSG00000164604-GPR85    | ENSG00000167680-SEMA6B   | ENSG00000171227-TMEM37        | ENSG00000176108-CHMP6      |
| ENSG00000164610-RP9      | ENSG00000167695-FAM57A   | ENSG00000171241-SHCBP1        | ENSG00000176125-UFSF1      |
| ENSG00000164611-PTTG1    | ENSG00000167723-TRPV3    | ENSG00000171345-KRT19         | ENSG00000176148-TCP11L1    |
| ENSG00000164619-BMPER    | ENSG00000167747-C19orf48 | ENSG00000171401-KRT13         | ENSG00000176170-SPHK1      |
| ENSG00000164654-MIOS     | ENSG00000167755-KLK6     | ENSG00000171462-DLK2          | ENSG00000176208-ATAD5      |
| ENSG00000164932-CTHRC1   | ENSG00000167766-ZNF83    | ENSG00000171612-SLC25A33      | ENSG00000176396-EID2       |
| ENSG00000164946-FREM1    | ENSG00000167768-KRT1     | ENSG00000171617-ENC1          | ENSG00000176476-CCDC101    |
| ENSG00000164953-TMEM67   | ENSG00000167889-MGAT5B   | ENSG00000171658-RP11-443P15.2 | ENSG00000176715-ACSF3      |
| ENSG00000165030-NFIL3    | ENSG00000168077-SCARA3   | ENSG00000171703-TCEA2         | ENSG00000176720-BOK        |
| ENSG00000165102-HGSNAT   | ENSG00000168078-PBK      | ENSG00000171848-RRM2          | ENSG00000176788-BASP1      |
| ENSG00000165105-RASEF    | ENSG00000168101-NUDT16L1 | ENSG00000172009-THOP1         | ENSG00000176890-TYMS       |
| ENSG00000165282-PIGO     | ENSG00000168143-FAM83B   | ENSG00000172037-LAMB2         | ENSG00000176907-C8orf4     |
| ENSG00000165304-MELK     | ENSG00000168159-RNF187   | ENSG00000172059-KLF11         | ENSG00000176928-GCNT4      |
| ENSG00000165359-DDX26B   | ENSG00000168301-KCTD6    | ENSG00000172062-SMN1          | ENSG00000177494-ZBED2      |
| ENSG00000165406-MARCH8   | ENSG00000168303-MPLKIP   | ENSG00000172081-MOB3A         | ENSG00000177706-FAM20C     |
| ENSG00000165449-SLC16A9  | ENSG00000168502-MTCL1    | ENSG00000172175-MALT1         | ENSG00000177791-MYOZ1      |
| ENSG00000165474-GJB2     | ENSG00000168743-NPNT     | ENSG00000172197-MBOAT1        | ENSG00000178053-MLF1       |
| ENSG00000165480-SKA3     | ENSG00000168769-TET2     | ENSG00000172201-ID4           | ENSG00000178188-SH2B1      |
| ENSG00000165512-ZNF22    | ENSG00000168778-TCTN2    | ENSG00000172262-ZNF131        | ENSG00000178202-KDEL2      |
| ENSG00000165591-FAAH2    | ENSG00000168781-PPIP5K1  | ENSG00000172273-HINFP         | ENSG00000178338-ZNF354B    |

Genes uniquely downregulated in UMUC1 cells following rosiglitazone treatment (continued)

|                          |                           |                           |                          |
|--------------------------|---------------------------|---------------------------|--------------------------|
| ENSG00000178409-BEND3    | ENSG00000183023-SLC8A1    | ENSG00000186185-KIF18B    | ENSG00000196937-FAM3C    |
| ENSG00000178573-MAF      | ENSG00000183186-C2CD4C    | ENSG00000186281-GPAT2     | ENSG00000197024-ZNF398   |
| ENSG00000178764-ZHX2     | ENSG00000183291-SEP15     | ENSG00000186318-BACE1     | ENSG00000197037-ZSCAN25  |
| ENSG00000178852-EFCAB13  | ENSG00000183307-CECR6     | ENSG00000186814-ZSCAN30   | ENSG00000197043-ANXA6    |
| ENSG00000178917-ZNF852   | ENSG00000183309-ZNF623    | ENSG00000186831-KRT17P2   | ENSG00000197045-GMFB     |
| ENSG00000178996-SNX18    | ENSG00000183337-BCOR      | ENSG00000186973-FAM183A   | ENSG00000197056-ZMYM1    |
| ENSG00000178999-AURKB    | ENSG00000183484-GPR132    | ENSG00000187189-TSPYL4    | ENSG00000197062-ZSCAN26  |
| ENSG00000179010-MRFAP1   | ENSG00000183496-MEX3B     | ENSG00000187244-BCAM      | ENSG00000197093-GAL3ST4  |
| ENSG00000179029-TMEM107  | ENSG00000183617-MRPL54    | ENSG00000187498-COL4A1    | ENSG00000197111-PCBP2    |
| ENSG00000179195-ZNF664   | ENSG00000183628-DGCR6     | ENSG00000187514-PTMA      | ENSG00000197145-VEPH1    |
| ENSG00000179222-MAGED1   | ENSG00000183655-KLHL25    | ENSG00000187554-TLR5      | ENSG00000197355-UAP1L1   |
| ENSG00000179431-FJX1     | ENSG00000183666-GUSBP1    | ENSG00000187626-ZKSCAN4   | ENSG00000197362-ZNF786   |
| ENSG00000179950-PUF60    | ENSG00000183688-FAM101B   | ENSG00000187630-DHRS4L2   | ENSG00000197408-CYP2B6   |
| ENSG00000179981-TSHZ1    | ENSG00000183729-NPBWR1    | ENSG00000187634-SAMD11    | ENSG00000197415-ZNF786   |
| ENSG00000180229-HERC2P3  | ENSG00000183741-CBX6      | ENSG00000187676-B3GALTL   | ENSG00000197461-PDGFA    |
| ENSG00000180251-SLC9A4   | ENSG00000183760-PAPL      | ENSG00000187678-SPRY4     | ENSG00000197496-SLC2A10  |
| ENSG00000180592-SKIDA1   | ENSG00000183856-IQGAP3    | ENSG00000187735-TCEA1     | ENSG00000197535-MYO5A    |
| ENSG00000180611-MB21D2   | ENSG00000183864-TOB2      | ENSG00000187792-ZNF70     | ENSG00000197587-DMBX1    |
| ENSG00000180626-ZNF594   | ENSG00000184014-DENND5A   | ENSG00000187951-ARHGAP11B | ENSG00000197614-MFAP5    |
| ENSG00000180806-HOXC9    | ENSG00000184205-TSPYL2    | ENSG00000187987-ZSCAN23   | ENSG00000197712-FAM114A1 |
| ENSG00000180938-ZNF572   | ENSG00000184220-CMSS1     | ENSG00000188001-TPRG1     | ENSG00000197724-PHF2     |
| ENSG00000180998-GPR137C  | ENSG00000184384-MAML2     | ENSG00000188070-C11orf95  | ENSG00000197728-RPS26    |
| ENSG00000181019-NQO1     | ENSG00000184500-PROS1     | ENSG00000188158-NHS       | ENSG00000197747-S100A10  |
| ENSG00000181026-AEN      | ENSG00000184517-ZFP1      | ENSG00000188211-NCR3LG1   | ENSG00000197905-TEAD4    |
| ENSG00000181220-ZNF746   | ENSG00000184584-TMEM173   | ENSG00000188486-H2AFX     | ENSG00000198018-ENTPD7   |
| ENSG00000181264-TMEM136  | ENSG00000184743-ATL3      | ENSG00000188643-S100A16   | ENSG00000198040-ZNF84    |
| ENSG00000181396-OGFOD3   | ENSG00000184897-H1FX      | ENSG00000189057-FAM111B   | ENSG00000198146-ZNF770   |
| ENSG00000181449-SOX2     | ENSG00000184916-JAG2      | ENSG00000189060-H1FO      | ENSG00000198369-SPRED2   |
| ENSG00000181467-RAP2B    | ENSG00000185085-INTS5     | ENSG00000189067-LITAF     | ENSG00000198429-ZNF69    |
| ENSG00000181588-MEX3D    | ENSG00000185088-RPS27L    | ENSG00000189079-ARID2     | ENSG00000198443-KRTAP4-1 |
| ENSG00000181690-PLAG1    | ENSG00000185112-FAM43A    | ENSG00000189136-UBE2Q2P1  | ENSG00000198467-TPM2     |
| ENSG00000181804-SLC9A9   | ENSG00000185158-LRRC37B   | ENSG00000189182-KRT77     | ENSG00000198498-TMA16    |
| ENSG00000181982-CCDC149  | ENSG00000185168-LINC00482 | ENSG00000189366-ALG1L     | ENSG00000198554-WDHD1    |
| ENSG00000182022-CHST15   | ENSG00000185189-NRBP2     | ENSG00000189403-HMGB1     | ENSG00000198585-NUDT16   |
| ENSG00000182040-USH1G    | ENSG00000185219-ZNF445    | ENSG00000196110-ZNF699    | ENSG00000198642-KLHL9    |
| ENSG00000182054-IDH2     | ENSG00000185252-ZNF74     | ENSG00000196152-ZNF79     | ENSG00000198668-CALM1    |
| ENSG00000182158-CREB3L2  | ENSG00000185262-UBALD2    | ENSG00000196159-FAT4      | ENSG00000198682-PAPSS2   |
| ENSG00000182196-ARL6IP4  | ENSG00000185269-NOTUM     | ENSG00000196275-GTF2IRD2  | ENSG00000198689-SLC9A6   |
| ENSG00000182310-SPACA6P  | ENSG00000185306-C12orf56  | ENSG00000196363-WDR5      | ENSG00000198707-CEP290   |
| ENSG00000182379-NXPH4    | ENSG00000185338-SOCS1     | ENSG00000196453-ZNF777    | ENSG00000198768-APCDD1L  |
| ENSG00000182481-KPNA2    | ENSG00000185437-SH3BGR    | ENSG00000196456-ZNF775    | ENSG00000198816-ZNF358   |
| ENSG00000182541-LIMK2    | ENSG00000185513-L3MBTL1   | ENSG00000196526-AFAP1     | ENSG00000198824-CHAMP1   |
| ENSG00000182551-AD11     | ENSG00000185567-AHNAK2    | ENSG00000196588-MKL1      | ENSG00000198837-DENND4B  |
| ENSG00000182718-ANXA2    | ENSG00000185585-OLFML2A   | ENSG00000196611-MMP1      | ENSG00000198860-TSEN15   |
| ENSG00000182809-CRIP2    | ENSG00000185650-ZFP36L1   | ENSG00000196628-TCF4      | ENSG00000198890-PRMT6    |
| ENSG00000182831-C16orf72 | ENSG00000185842-DNAH14    | ENSG00000196754-S100A2    | ENSG00000198900-TOP1     |
| ENSG00000182841-RRP7B    | ENSG00000185920-PTCH1     | ENSG00000196843-ARID5A    | ENSG00000198901-PRC1     |
| ENSG00000182871-COL18A1  | ENSG00000185963-BICD2     | ENSG00000196865-NHLRC2    | ENSG00000198954-KIAA1279 |
| ENSG00000182983-ZNF662   | ENSG00000186081-KRT5      | ENSG00000196922-ZNF252P   | ENSG00000198959-TGM2     |
| ENSG00000183010-PYCR1    | ENSG00000186106-ANKRD46   | ENSG00000196924-FLNA      | ENSG00000198964-SGMS1    |

Genes uniquely downregulated in UMUC1 cells following rosiglitazone treatment (continued)

|                              |                               |                                |                                |
|------------------------------|-------------------------------|--------------------------------|--------------------------------|
| ENSG00000204011-COL5A1-AS1   | ENSG00000224578-HNRNPA1P48    | ENSG00000235142-RP1-60019.1    | ENSG00000250510-GPR162         |
| ENSG00000204054-LINC00963    | ENSG00000224635-RP4-564F22.5  | ENSG00000235257-ITGA9-AS1      | ENSG00000250899-RP11-253E3.3   |
| ENSG00000204177-BMS1P1       | ENSG00000224712-NPIPA3        | ENSG00000235269-AL162759.1     | ENSG00000251095-RP11-115D19.1  |
| ENSG00000204217-BMP2R2       | ENSG00000224791-KRT18P39      | ENSG00000235493-AC092415.1     | ENSG00000251176-RP11-97E7.1    |
| ENSG00000204262-COL5A2       | ENSG00000224914-LINC00863     | ENSG00000235535-RP11-532N4.2   | ENSG00000251196-RP11-54F2.1    |
| ENSG00000204580-DDR1         | ENSG00000225151-GOLGA2P7      | ENSG00000236539-HNRNPA1P54     | ENSG00000251322-SHANK3         |
| ENSG00000204682-CASC10       | ENSG00000225210-DUXAP10       | ENSG00000237128-RP11-351M16.3  | ENSG00000253103-RP11-946L20.4  |
| ENSG00000204852-TCTN1        | ENSG00000225383-SFTA1P        | ENSG00000237190-CDKN2AIPNL     | ENSG00000253293-HOXA10         |
| ENSG00000204859-ZBTB48       | ENSG00000225492-GBP1P1        | ENSG00000237438-CECR7          | ENSG00000253716-RP13-582O9.5   |
| ENSG00000204869-IGFL4        | ENSG00000225742-RP11-513G11.4 | ENSG00000237523-LINC00857      | ENSG00000253958-CLDN23         |
| ENSG00000204909-SPINK9       | ENSG00000226107-AC004383.3    | ENSG00000237609-AF064858.10    | ENSG00000254004-ZNF260         |
| ENSG00000204947-ZNF425       | ENSG00000226137-BAIAP2-AS1    | ENSG00000237864-LINC00322      | ENSG00000254254-RP11-17A4.2    |
| ENSG00000205213-LGR4         | ENSG00000226308-RP4-813D12.3  | ENSG00000237943-PRKCQ-AS1      | ENSG00000254338-MAFA-AS1       |
| ENSG00000205221-VIT          | ENSG00000226383-AC093375.1    | ENSG00000237978-RP11-385J1.2   | ENSG00000254453-NAV2-AS2       |
| ENSG00000205268-PDE7A        | ENSG00000226690-AC005281.1    | ENSG00000237989-AP001046.5     | ENSG00000254726-MEX3A          |
| ENSG00000205420-KRT6A        | ENSG00000226937-CEP164P1      | ENSG00000238083-LRRC37A2       | ENSG00000254894-NAV2-AS1       |
| ENSG00000205542-TMSB4X       | ENSG00000227028-SLC8A1-AS1    | ENSG00000238366-Y_RNA          | ENSG00000255571-LINC00925      |
| ENSG00000205622-AF064858.6   | ENSG00000227036-LINC00511     | ENSG00000240024-LINC00888      | ENSG00000255717-SNHG1          |
| ENSG00000205795-CYS1         | ENSG00000227372-TP73-AS1      | ENSG00000240857-RDH14          | ENSG00000255874-LINC00346      |
| ENSG00000205922-ONECUT3      | ENSG00000227473-TSSK5P        | ENSG00000241839-PLEKHO2        | ENSG00000256235-SMIM3          |
| ENSG00000205978-NYNRIN       | ENSG00000227479-AC124861.1    | ENSG00000242265-PEG10          | ENSG00000256612-CYP2B7P        |
| ENSG00000206149-HERC2P9      | ENSG00000227739-TUBB          | ENSG00000242348-RN7SL561P      | ENSG00000257225-RP11-328C8.4   |
| ENSG00000206195-DUXAP8       | ENSG00000227825-SLC9A7P1      | ENSG00000242498-ARPIP          | ENSG00000257556-RP11-44N21.1   |
| ENSG00000206418-RAB12        | ENSG00000228649-AC005682.5    | ENSG00000243725-TTC4           | ENSG00000257923-CUX1           |
| ENSG00000212747-FAM127C      | ENSG00000229635-RP4-713B5.2   | ENSG00000243775-OSTCP1         | ENSG00000258123-RP11-314D7.2   |
| ENSG00000213064-SFT2D2       | ENSG00000229835-KHSRPP1       | ENSG00000244115-DNAJC25-GNG10  | ENSG00000258301-RP11-488C13.5  |
| ENSG00000213071-LPAL2        | ENSG00000229956-ZRANB2-AS2    | ENSG00000244306-LINC01296      | ENSG00000258701-LINC00638      |
| ENSG00000213412-HNRNPA1P33   | ENSG00000230015-RP11-80B9.4   | ENSG00000245149-RNF139-AS1     | ENSG00000258806-OR11H7         |
| ENSG00000213762-ZNF134       | ENSG00000230091-TMEM254-AS1   | ENSG00000245532-NEAT1          | ENSG00000258932-CTD-3006G17.2  |
| ENSG00000213920-MDP1         | ENSG00000230262-MIRLET7DHG    | ENSG00000245694-CRNDE          | ENSG00000259345-RP11-624L4.1   |
| ENSG00000213923-CSNK1E       | ENSG00000230606-AC159540.1    | ENSG00000245748-RP11-367J11.2  | ENSG00000259380-RP11-346D14.1  |
| ENSG00000214357-NEURL1B      | ENSG00000230651-RGPD4-AS1     | ENSG00000246985-SOCS2-AS1      | ENSG00000259409-RP11-521C20.3  |
| ENSG00000214376-VSTM5        | ENSG00000230882-AC005077.14   | ENSG00000247134-RP11-11N9.4    | ENSG00000259623-RP11-156E6.1   |
| ENSG00000214553-LRRC37A11P   | ENSG00000230937-MIR205HG      | ENSG00000247315-ZCCHC3         | ENSG00000259627-RP11-244F12.2  |
| ENSG00000214717-ZBED1        | ENSG00000231764-DLX6-AS1      | ENSG00000247679-RP11-1277A3.1  | ENSG00000259758-CASC7          |
| ENSG00000214753-HNRNPUL2     | ENSG00000231826-AC016735.2    | ENSG00000248429-RP11-597D13.9  | ENSG00000259820-AC083843.1     |
| ENSG00000215012-C22orf29     | ENSG00000232063-RP11-307E17.8 | ENSG00000248690-HAS2-AS1       | ENSG00000260128-ULK4P2         |
| ENSG00000215105-TTC3P1       | ENSG00000232164-AC092669.3    | ENSG00000248866-USP46-AS1      | ENSG00000260131-LINC00556      |
| ENSG00000215190-LINC00680    | ENSG00000232316-RP1-124C6.1   | ENSG00000248932-RP11-319G6.1   | ENSG00000260260-SNHG19         |
| ENSG00000215256-DHRS4-AS1    | ENSG00000232445-RP11-132A1.4  | ENSG00000249242-TMEM150C       | ENSG00000260265-RP11-44F21.5   |
| ENSG00000215417-MIR17HG      | ENSG00000232480-TGFB2-AS1     | ENSG00000249409-RP11-501E14.1  | ENSG00000260285-RP11-600F24.7  |
| ENSG00000215447-BX322557.10  | ENSG00000232533-AC093673.5    | ENSG00000249437-NAIP           | ENSG00000260992-DOCK9-AS2      |
| ENSG00000215712-TMEM242      | ENSG00000232838-PET117        | ENSG00000249574-AC226118.1     | ENSG00000261008-AC004158.2     |
| ENSG00000218336-TENM3        | ENSG00000233237-LINC00472     | ENSG00000249614-RP11-703G6.1   | ENSG00000261116-RP3-523K23.2   |
| ENSG00000220785-MTMR9LP      | ENSG00000233494-AC009963.3    | ENSG00000249641-HOXC13-AS      | ENSG00000261468-RP11-1024P17.1 |
| ENSG00000221947-XKR9         | ENSG00000233901-LINC01503     | ENSG00000249731-RP11-259O2.3   | ENSG00000261488-RP11-757F18.5  |
| ENSG00000222009-BTBD19       | ENSG00000233913-CTC-575D19.1  | ENSG00000250021-C15orf38-AP3S2 | ENSG00000261572-RP11-384L8.1   |
| ENSG00000224189-HAGLR        | ENSG00000234769-WASH4P        | ENSG00000250127-CTD-2117L12.1  | ENSG00000261716-RP11-196G18.22 |
| ENSG00000224260-RP1-272L16.1 | ENSG00000234840-LINC01239     | ENSG00000250303-RP11-356J5.12  | ENSG00000261801-LOXL1-AS1      |
| ENSG00000224531-SMIM13       | ENSG00000235106-LINC00094     | ENSG00000250337-LINC01021      | ENSG00000262406-MMP12          |

Genes uniquely downregulated in UMUC1 cells following rosiglitazone treatment (continued)

|                                     |                                |
|-------------------------------------|--------------------------------|
| ENSG00000262758-CTD-3195I5.1        | ENSG00000277778-PGM5P2         |
| ENSG00000262772-RP11-353N14.2       | ENSG00000278396-RP11-120E11.2  |
| ENSG00000263585-RP11-498C9.13       | ENSG00000278705-HIST1H4B       |
| ENSG00000264020-AC027806.1          | ENSG00000279033-RP11-500C12.1  |
| ENSG00000264364-DYNLL2              | ENSG00000279184-RP3-323A16.1   |
| ENSG00000265203-RBP3                | ENSG00000279207-RP11-159D12.8  |
| ENSG00000265664-RP11-74H8.1         | ENSG00000279312-RP3-331H24.7   |
| ENSG00000265667-AP003550.1          | ENSG00000279364-RP11-463I20.1  |
| ENSG00000265763-ZNF488              | ENSG00000279399-RP11-369J21.12 |
| ENSG00000266158-RN7SL785P           | ENSG00000279417-RP11-382B18.1  |
| ENSG00000267026-RP11-92C4.3         | ENSG00000279442-LA16c-60D12.2  |
| ENSG00000267057-RP11-456O19.2       | ENSG00000279563-CH17-340M24.1  |
| ENSG00000267147-CTC-548K16.1        | ENSG00000279699-RP1-102K2.9    |
| ENSG00000267519-CTD-3252C9.4        | ENSG00000279838-RP4-635A23.6   |
| ENSG00000267530-AC006273.5          | ENSG00000279912-RP11-624A21.1  |
| ENSG00000267919-RP11-256I23.3       | ENSG00000280156-AC006548.28    |
| ENSG00000268912-CTD-2619J13.17      | ENSG00000280206-CTB-193M12.5   |
| ENSG00000269190-FBXO17              | ENSG00000280297-ABBA01031664.1 |
| ENSG00000269226-TMSB15B             | ENSG00000280351-CTD-2561B21.8  |
| ENSG00000269905-TFDP2               |                                |
| ENSG00000269994-RP11-276H19.2       |                                |
| ENSG00000270055-CTD-3092A11.2       |                                |
| ENSG00000270343-UNGP3               |                                |
| ENSG00000271741-RP11-244H3.4        |                                |
| ENSG00000271862-RP11-343L5.2        |                                |
| ENSG00000271882-KB-1410C5.5         |                                |
| ENSG00000272016-RP11-215G15.5       |                                |
| ENSG00000272316-XXbac-BPGBPG55C20.2 |                                |
| ENSG00000272524-RP11-254F7.4        |                                |
| ENSG00000272631-RP11-359E3.4        |                                |
| ENSG00000272761-LINC01279           |                                |
| ENSG00000272933-RP11-47A8.5         |                                |
| ENSG00000273033-RP11-67L2.2         |                                |
| ENSG00000273129-PACERR              |                                |
| ENSG00000273230-RP11-1246C19.1      |                                |
| ENSG00000273329-RP11-448A19.1       |                                |
| ENSG00000273760-CH17-360D5.3        |                                |
| ENSG00000274070-GATSL2              |                                |
| ENSG00000275322-RP11-262A16.1       |                                |
| ENSG00000275342-SGK223              |                                |
| ENSG00000275993-CH507-42P11.8       |                                |
| ENSG00000276043-UHRF1               |                                |
| ENSG00000276276-ARL17A              |                                |
| ENSG00000276550-HERC2P2             |                                |
| ENSG00000276600-RAB7B               |                                |
| ENSG00000276805-RP11-291L22.6       |                                |
| ENSG00000277013-CTC-526N19.1        |                                |
| ENSG00000277196-PRODH               |                                |
| ENSG00000277287-RP4-794I6.4         |                                |
| ENSG00000277443-MARCKS              |                                |

9) Genes uniquely downregulated in SW780 cells following rosiglitazone treatment

|                          |                          |                            |                               |
|--------------------------|--------------------------|----------------------------|-------------------------------|
| ENSG0000000971-CFH       | ENSG00000124813-RUNX2    | ENSG00000165895-ARHGAP42   | ENSG00000188313-PLSCR1        |
| ENSG00000003756-RBM5     | ENSG00000129538-RNASE1   | ENSG00000165949-IFI27      | ENSG00000196542-SPTSSB        |
| ENSG00000006534-ALDH3B1  | ENSG00000130234-ACE2     | ENSG00000166394-CYB5R2     | ENSG00000196917-HCAR1         |
| ENSG00000018236-CNTN1    | ENSG00000133019-CHRM3    | ENSG00000167508-MVD        | ENSG00000197565-COL4A6        |
| ENSG00000026751-SLAMF7   | ENSG00000133106-EPST11   | ENSG00000167656-LY6D       | ENSG00000197956-S100A6        |
| ENSG00000052344-PRSS8    | ENSG00000134321-RSAD2    | ENSG00000167700-MFSD3      | ENSG00000198324-FAM109A       |
| ENSG00000055732-MCOLN3   | ENSG00000134757-DSG3     | ENSG00000167741-GGT6       | ENSG00000198910-L1CAM         |
| ENSG00000056558-TRAF1    | ENSG00000135063-FAM189A2 | ENSG00000167779-IGFBP6     | ENSG00000203857-HSD3B1        |
| ENSG00000064787-BCAS1    | ENSG00000136383-ALPK3    | ENSG00000168874-ATOH8      | ENSG00000213228-RPL12P38      |
| ENSG00000066382-MPPED2   | ENSG00000136514-RTP4     | ENSG00000169213-RAB3B      | ENSG00000224652-LINC00885     |
| ENSG00000067066-SP100    | ENSG00000137338-PGBD1    | ENSG00000169245-CXCL10     | ENSG00000224769-AC069213.1    |
| ENSG00000078081-LAMP3    | ENSG00000137393-RNF144B  | ENSG00000169469-SPRR1B     | ENSG00000226510-UPK1A-AS1     |
| ENSG00000082397-EPB41L3  | ENSG00000137959-IFI44L   | ENSG00000169604-ANTXR1     | ENSG00000231131-LINC01468     |
| ENSG00000085552-IGSF9    | ENSG00000137965-IFI44    | ENSG00000169826-CSGALNACT2 | ENSG00000231298-LINC00704     |
| ENSG00000087494-PTHLH    | ENSG00000137975-CLCA2    | ENSG00000170369-CST2       | ENSG00000233041-PHGR1         |
| ENSG00000100321-SYNGR1   | ENSG00000138646-HERC5    | ENSG00000170581-STAT2      | ENSG00000243137-PSG4          |
| ENSG00000100985-MMP9     | ENSG00000139055-ERP27    | ENSG00000171858-RPS21      | ENSG00000248663-LINC00992     |
| ENSG00000101457-DNTTIP1  | ENSG00000142273-CBLC     | ENSG00000172345-STAR5      | ENSG00000249685-RP11-360F5.3  |
| ENSG00000102178-UBL4A    | ENSG00000142327-RNPEPL1  | ENSG00000173638-SLC19A1    | ENSG00000249992-TMEM158       |
| ENSG00000102962-CCL22    | ENSG00000143469-SYT14    | ENSG00000173705-SUSD5      | ENSG00000253414-RP11-150O12.6 |
| ENSG00000104848-KCNA7    | ENSG00000143507-DUSP10   | ENSG00000174498-IGDCC3     | ENSG00000255248-RP11-166D19.1 |
| ENSG00000105388-CEACAM5  | ENSG00000148346-LCN2     | ENSG00000174564-IL20RB     | ENSG00000257335-MGAM          |
| ENSG00000106025-TSPAN12  | ENSG00000149260-CAPN5    | ENSG00000174792-C4orf26    | ENSG00000266010-GATA6-AS1     |
| ENSG00000106066-CPVL     | ENSG00000149328-GLB1L2   | ENSG00000175591-P2RY2      | ENSG00000267397-RP11-873E20.1 |
| ENSG00000107957-SH3PXD2A | ENSG00000149557-FEZ1     | ENSG00000180801-ARXJ       | ENSG00000268864-CTB-167G5.6   |
| ENSG00000109084-TMEM97   | ENSG00000149564-ESAM     | ENSG00000181458-TMEM45A    | ENSG00000273245-RP11-434P11.2 |
| ENSG00000109511-ANXA10   | ENSG00000152217-SETBP1   | ENSG00000181652-ATG9B      | ENSG00000273780-ARHGAP23      |
| ENSG00000109667-SLC2A9   | ENSG00000156463-SH3RF2   | ENSG00000182010-RTKN2      | ENSG00000274370-AC144831.3    |
| ENSG00000110799-VWF      | ENSG00000156587-UBE2L6   | ENSG00000182484-WASH6P     | ENSG00000275216-RP11-54H7.4   |
| ENSG00000110848-CD69     | ENSG00000157168-NRG1     | ENSG00000183668-PSG9       | ENSG00000279296-RP11-609D21.3 |
| ENSG00000111799-COL12A1  | ENSG00000160932-LY6E     | ENSG00000183722-LHFP       | ENSG00000279569-RP11-394B2.1  |
| ENSG00000114812-VIPR1    | ENSG00000160959-LRRC14   | ENSG00000184305-CCSER1     |                               |
| ENSG00000115590-IL1R2    | ENSG00000162777-DENND2D  | ENSG00000184371-CSF1       |                               |
| ENSG00000118495-PLAGL1   | ENSG00000163207-IVL      | ENSG00000185201-IFITM2     |                               |
| ENSG00000118515-SGK1     | ENSG00000163297-ANTXR2   | ENSG00000185272-RBM11      |                               |
| ENSG00000119125-GDA      | ENSG00000163435-ELF3     | ENSG00000185697-MYBL1      |                               |
| ENSG00000120337-TNFSF18  | ENSG00000163565-IFI16    | ENSG00000185885-IFITM1     |                               |
| ENSG00000120675-DNAJC15  | ENSG00000164128-NPY1R    | ENSG00000186847-KRT14      |                               |
| ENSG00000124126-PREX1    | ENSG00000164742-ADCY1    | ENSG00000187123-LYPD6      |                               |
| ENSG00000124256-ZBP1     | ENSG00000164867-NOS3     | ENSG00000188064-WNT7B      |                               |

10) Genes uniquely downregulated in 5637 cells following rosiglitazone treatment

ENSG00000044524-EPHA3  
ENSG00000082684-SEMA5B  
ENSG00000087495-PHACTR3  
ENSG00000101489-CELF4  
ENSG00000115616-SLC9A2  
ENSG00000119669-IRF2BPL  
ENSG00000128917-DLL4  
ENSG00000131746-TNS4  
ENSG00000134531-EMP1  
ENSG00000139438-FAM222A  
ENSG00000145824-CXCL14  
ENSG00000151136-BTBD11  
ENSG00000152518-ZFP36L2  
ENSG00000160282-FTCD  
ENSG00000163704-PRRT3  
ENSG00000171951-SCG2  
ENSG00000173334-TRIB1  
ENSG00000177575-CD163  
ENSG00000179750-APOBEC3B  
ENSG00000182168-UNC5C  
ENSG00000184838-PRR16  
ENSG00000185022-MAFF  
ENSG00000196104-SPOCK3  
ENSG00000272027-RP11-529E15.1  
ENSG00000276249-AC237047.1  
ENSG00000277027-RNase\_MRP



11) Genes downregulated in common in UMUC1 and SW780 cells following rosiglitazone treatment

|                         |                          |                          |                               |
|-------------------------|--------------------------|--------------------------|-------------------------------|
| ENSG0000019549-SNAI2    | ENSG00000121690-DEPDC7   | ENSG00000148677-ANKRD1   | ENSG00000186193-SAPCD2        |
| ENSG00000034510-TMSB10  | ENSG00000121742-GJB6     | ENSG00000148773-MKI67    | ENSG00000187720-THSD4         |
| ENSG00000042493-CAPG    | ENSG00000122641-INHBA    | ENSG00000150630-VEGFC    | ENSG00000188921-PTPLAD2       |
| ENSG00000059804-SLC2A3  | ENSG00000125148-MT2A     | ENSG00000152661-GJA1     | ENSG00000197641-SERPINB13     |
| ENSG00000065320-NTN1    | ENSG00000125398-SOX9     | ENSG00000152785-BMP3     | ENSG00000198053-SIRPA         |
| ENSG00000065675-PRKCQ   | ENSG00000125848-FLRT3    | ENSG00000153993-SEMA3D   | ENSG00000198121-LPAR1         |
| ENSG00000066279-ASPM    | ENSG00000125968-ID1      | ENSG00000155850-SLC26A2  | ENSG00000198315-ZKSCAN8       |
| ENSG00000071909-MYO3B   | ENSG00000127863-TNFRSF19 | ENSG00000158169-FANCC    | ENSG00000198879-SFMBT2        |
| ENSG00000076716-GPC4    | ENSG00000129116-PALLD    | ENSG00000158691-ZSCAN12  | ENSG00000198924-DCLRE1A       |
| ENSG00000078018-MAP2    | ENSG00000130701-RBBP8NL  | ENSG00000158966-CACHD1   | ENSG00000203727-SAMD5         |
| ENSG00000078401-EDN1    | ENSG00000131711-MAP1B    | ENSG00000159176-CSRP1    | ENSG00000210135-MT-TN         |
| ENSG00000091436-PK      | ENSG00000132846-ZBED3    | ENSG00000159216-RUNX1    | ENSG00000223960-AC009948.5    |
| ENSG00000091986-CCDC80  | ENSG00000133466-C1QTNF6  | ENSG00000159263-SIM2     | ENSG00000237807-RP11-400K9.4  |
| ENSG00000092969-TGFB2   | ENSG00000134259-NGF      | ENSG00000163209-SPRR3    | ENSG00000243701-LINC00883     |
| ENSG00000100097-LGALS1  | ENSG00000134363-FST      | ENSG00000163219-ARHGAP25 | ENSG00000250685-RP11-486L19.2 |
| ENSG00000102781-KATNAL1 | ENSG00000134755-DSC2     | ENSG00000163507-KIAA1524 | ENSG00000265491-RNF115        |
| ENSG00000105048-TNNT1   | ENSG00000136114-THSD1    | ENSG00000164104-HMGB2    | ENSG00000270069-MIR222HG      |
| ENSG00000105143-SLC1A6  | ENSG00000136542-GALNT5   | ENSG00000164251-F2RL1    |                               |
| ENSG00000105668-UPK1A   | ENSG00000136720-HS6ST1   | ENSG00000164379-FOXQ1    |                               |
| ENSG00000105855-ITGB8   | ENSG00000137185-ZSCAN9   | ENSG00000165434-PGM2L1   |                               |
| ENSG00000105968-H2AFV   | ENSG00000137563-GGH      | ENSG00000166396-SERPINB7 |                               |
| ENSG00000105974-CAV1    | ENSG00000137801-THBS1    | ENSG00000166670-MMP10    |                               |
| ENSG00000106258-CYP3A5  | ENSG00000138311-ZNF365   | ENSG00000167601-AXL      |                               |
| ENSG00000107984-DKK1    | ENSG00000139734-DIAPH3   | ENSG00000167900-TK1      |                               |
| ENSG00000109790-KLHL5   | ENSG00000140955-ADAD2    | ENSG00000168916-ZNF608   |                               |
| ENSG00000110723-EXPH5   | ENSG00000142089-IFITM3   | ENSG00000171877-FRMD5    |                               |
| ENSG00000111843-TMEM14C | ENSG00000142156-COL6A1   | ENSG00000173706-HEG1     |                               |
| ENSG00000111981-ULBP1   | ENSG00000142227-EMP3     | ENSG00000174669-SLC29A2  |                               |
| ENSG00000112029-FBXO5   | ENSG00000142871-CYR61    | ENSG00000175063-UBE2C    |                               |
| ENSG00000113580-NR3C1   | ENSG00000143153-ATP1B1   | ENSG00000176641-RNF152   |                               |
| ENSG00000115380-EFEMP1  | ENSG00000143322-ABL2     | ENSG00000176697-BDNF     |                               |
| ENSG00000115414-FN1     | ENSG00000143479-DYRK3    | ENSG00000177469-PTRF     |                               |
| ENSG00000115457-IGFBP2  | ENSG00000144063-MALL     | ENSG00000177873-ZNF619   |                               |
| ENSG00000117143-UAP1    | ENSG00000145287-PLAC8    | ENSG00000180694-TMEM64   |                               |
| ENSG00000117228-GBP1    | ENSG00000145431-PDGFC    | ENSG00000181104-F2R      |                               |
| ENSG00000117525-F3      | ENSG00000145632-PLK2     | ENSG00000181634-TNFSF15  |                               |
| ENSG00000118523-CTGF    | ENSG00000146648-EGFR     | ENSG00000183347-GBP6     |                               |
| ENSG00000119326-CTNNA1  | ENSG00000147003-TMEM27   | ENSG00000183779-ZNF703   |                               |
| ENSG00000120738-EGR1    | ENSG00000147180-ZNF711   | ENSG00000183853-KIRREL   |                               |
| ENSG00000120833-SOCS2   | ENSG00000147650-LRP12    | ENSG00000185070-FLRT2    |                               |

12) Genes downregulated in common in SW780 and 5637 cells following rosiglitazone treatment

ENSG00000109193-SULT1E1  
ENSG00000119508-NR4A3  
ENSG00000148344-PTGES  
ENSG00000163545-NUAK2  
ENSG00000165272-AQP3  
ENSG00000226958-RNA28S5  
ENSG00000227195-MIR663AHG  
ENSG00000274173-RP4-568C11.4

13) Genes downregulated in common in UMUC1 and 5637 cells following rosiglitazone treatment

ENSG00000102870-ZNF629  
ENSG00000116285-ERRFI1  
ENSG00000117318-ID3  
ENSG00000133069-TMCC2  
ENSG00000138166-DUSP5  
ENSG00000154175-ABI3BP  
ENSG00000162981-FAM84A  
ENSG00000170961-HAS2  
ENSG00000171243-SOSTDC1  
ENSG00000171388-APLN  
ENSG00000180340-FZD2  
ENSG00000180730-SHISA2  
ENSG00000189184-PCDH18  
ENSG00000198435-NRARP  
ENSG00000261150-EPPK1

14) Genes downregulated in common in UMUC1, SW780, and 5637 cells following rosiglitazone treatment

ENSG00000073756-PTGS2  
ENSG00000081052-COL4A4  
ENSG00000110876-SELPLG  
ENSG00000115461-IGFBP5  
ENSG00000120149-MSX2  
ENSG00000168386-FILIP1L  
ENSG00000181031-RPH3AL  
ENSG00000197632-SERPINB2  
ENSG00000202198-RN7SK  
ENSG00000225840-RNA45S5

| <b>Supplementary Table S3: TFAP2A and TFAP2C Expression in Invasive UCC and Invasive SqD</b> |          |             |              |                            |
|----------------------------------------------------------------------------------------------|----------|-------------|--------------|----------------------------|
| <b>TFAP2A</b>                                                                                | <b>N</b> | <b>Mean</b> | <b>STDEV</b> | <b>p value</b>             |
| Invasive UCC                                                                                 | 83       | 1.16        | 2.01         | <0.001 (Wilcoxon rank sum) |
| Invasive SqD                                                                                 | 21       | 4.76        | 2.32         |                            |
| <b>TFAP2C</b>                                                                                | <b>N</b> | <b>Mean</b> | <b>STDEV</b> | <b>p value</b>             |
| Invasive UCC                                                                                 | 84       | 3.1         | 2.99         | 0.015 (Wilcoxon rank sum)  |
| Invasive SqD                                                                                 | 20       | 4.85        | 2.85         |                            |

**Supplementary Table S4: Association of TFAP2A and TFAP2C Expression with Clinical Variables in Invasive UCC**

| <b>Lymph node metastasis</b> |                 |                 |                 |                         |
|------------------------------|-----------------|-----------------|-----------------|-------------------------|
| <b>TFAP2A</b>                | <b>N</b>        | <b>Positive</b> | <b>Negative</b> | <b>p value</b>          |
| pN0                          | 58              | 8               | 50              | 0.049 (Chi square test) |
| pN1-pN3                      | 36              | 11              | 25              |                         |
| <b>TFAP2C</b>                |                 |                 |                 |                         |
| <b>N</b>                     | <b>Yes</b>      | <b>No</b>       | <b>p value</b>  |                         |
| pN0                          | 60              | 27              | 33              | 0.635 (Chi square test) |
| pN1-pN3                      | 36              | 18              | 18              |                         |
| <b>Distant recurrence</b>    |                 |                 |                 |                         |
| <b>TFAP2A</b>                | <b>N</b>        | <b>Positive</b> | <b>Negative</b> | <b>p value</b>          |
| No recurrence                | 76              | 13              | 63              | 0.137 (Chi square test) |
| Recurrence                   | 21              | 7               | 14              |                         |
| <b>TFAP2C</b>                |                 |                 |                 |                         |
| <b>N</b>                     | <b>Positive</b> | <b>Negative</b> | <b>p value</b>  |                         |
| No recurrence                | 78              | 32              | 46              | 0.037 (Chi square test) |
| Recurrence                   | 21              | 14              | 7               |                         |

Supplementary Figure S1: Biological process identified by Gene Ontology (GO) analysis based on significantly downregulated genes following PPAR $\gamma$  activation in UMCUC1, SW780, and 5637 cells. Top 10 biological process categories of significantly downregulated by PPAR $\gamma$  activation are shown. The vertical axis shows biological process categories, and horizontal axis shows the  $-\log_{10}(\text{P-value})$ .

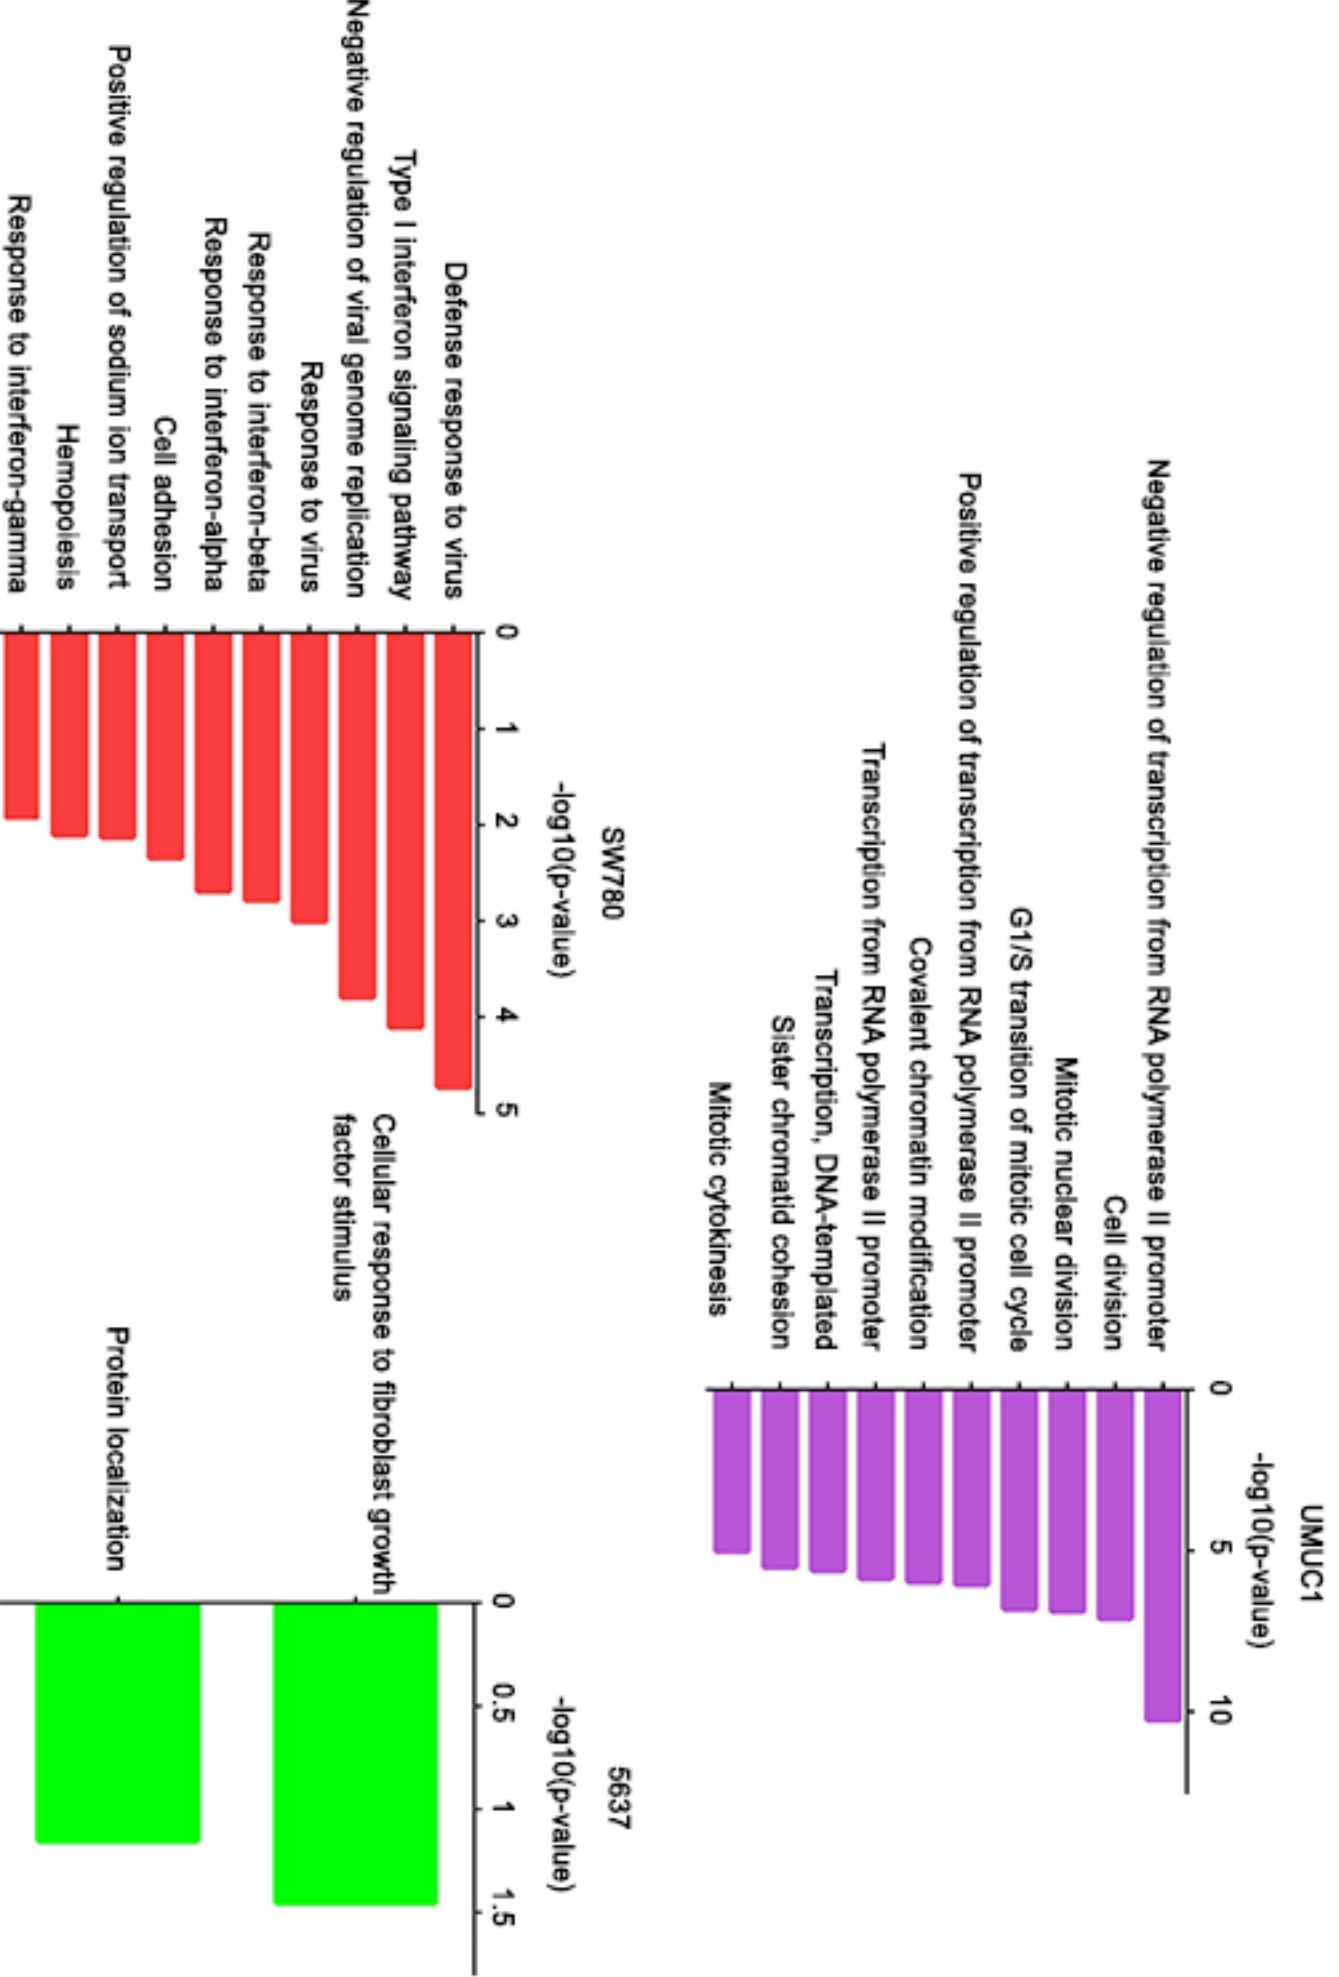

Supplementary Figure S2: Boxplot displays of gene expression of values ( $\log_2(\text{FPKM} + 1)$ ) for TFAP2A, CTCF, and KLF4. TFAP2A (A), CTCF (B) and KLF4 (C) expression from RNA-seq analysis following treatment with DMSO (black filled circle) or PPAR $\gamma$  agonist (TZD) (red filled circle) as described in materials and methods.

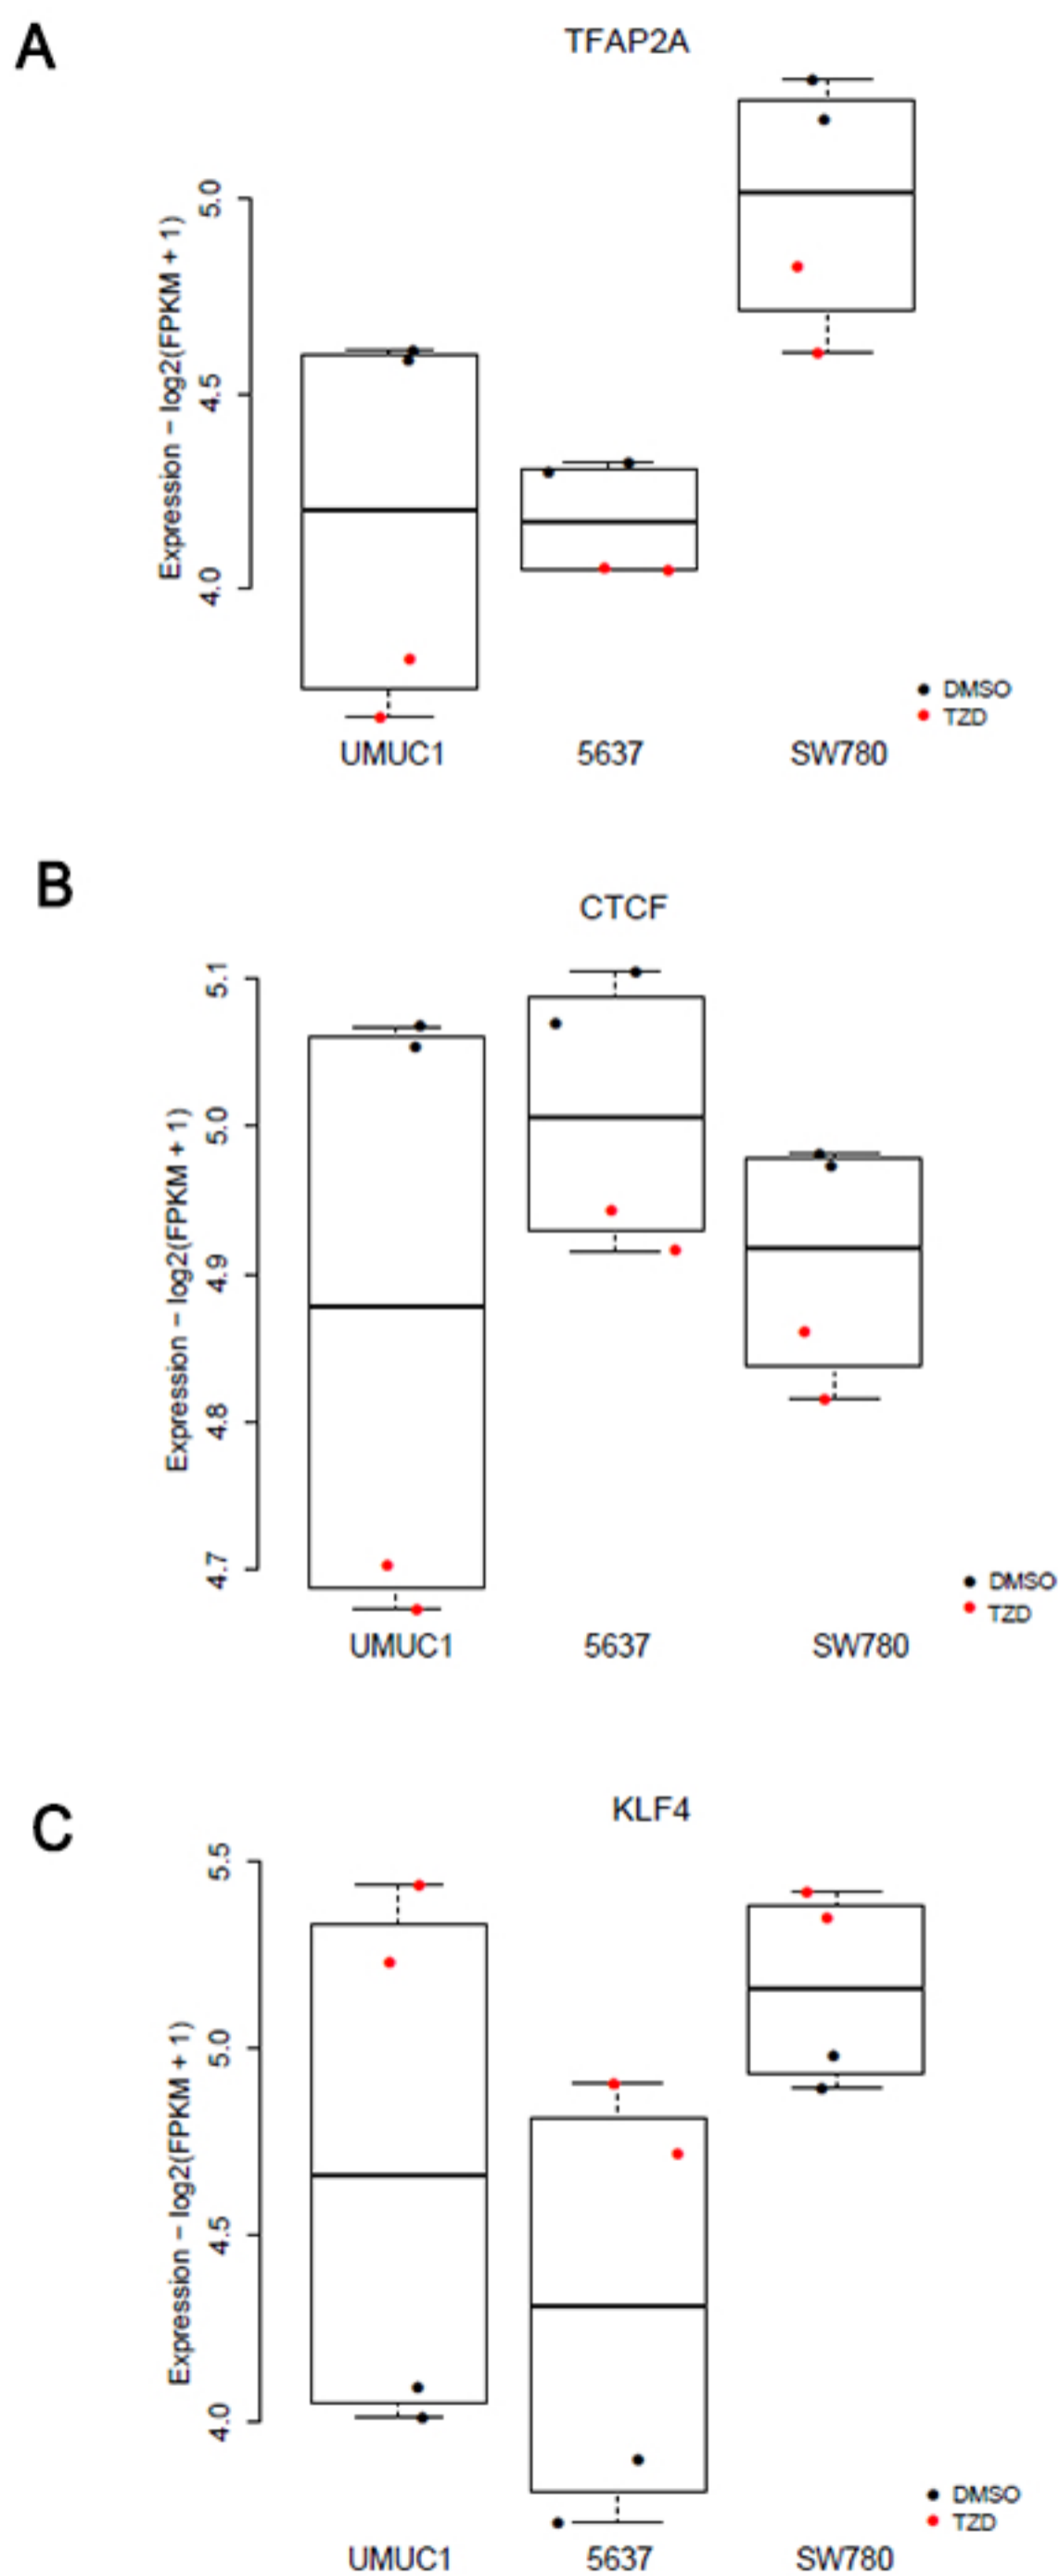

**Supplementary Figure S3:** Expression of TFAP2A and TFAP2C in T24 cells overexpressing TFAP2A or TFAP2C. A) Western blotting analysis of TFAP2A and TFAP2C protein expression levels in T24 cells overexpressing TFAP2A (left) or TFAP2C (right). B) q-RT-PCR analysis of TFAP2A and TFAP2C expression in T24 cells overexpressing TFAP2A and TFAP2C. \* $p < 0.05$ , \*\*\* $p < 0.001$  (Student's *t* test).

**A**

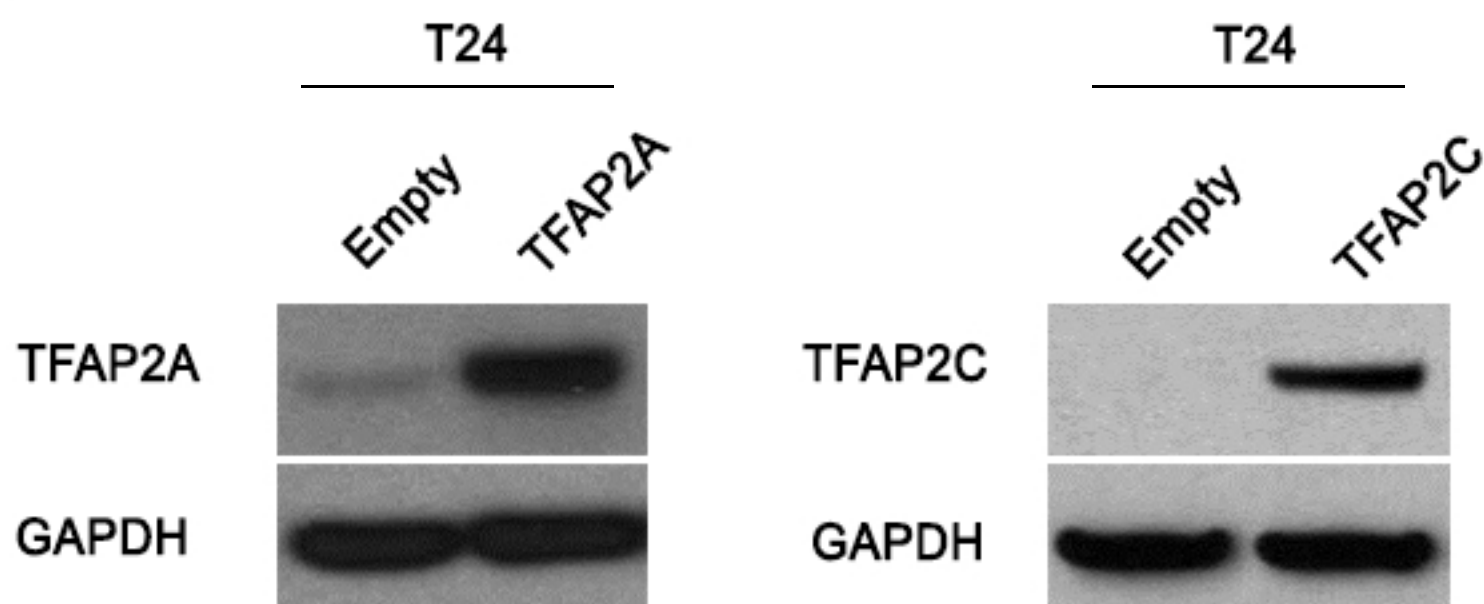

**B**

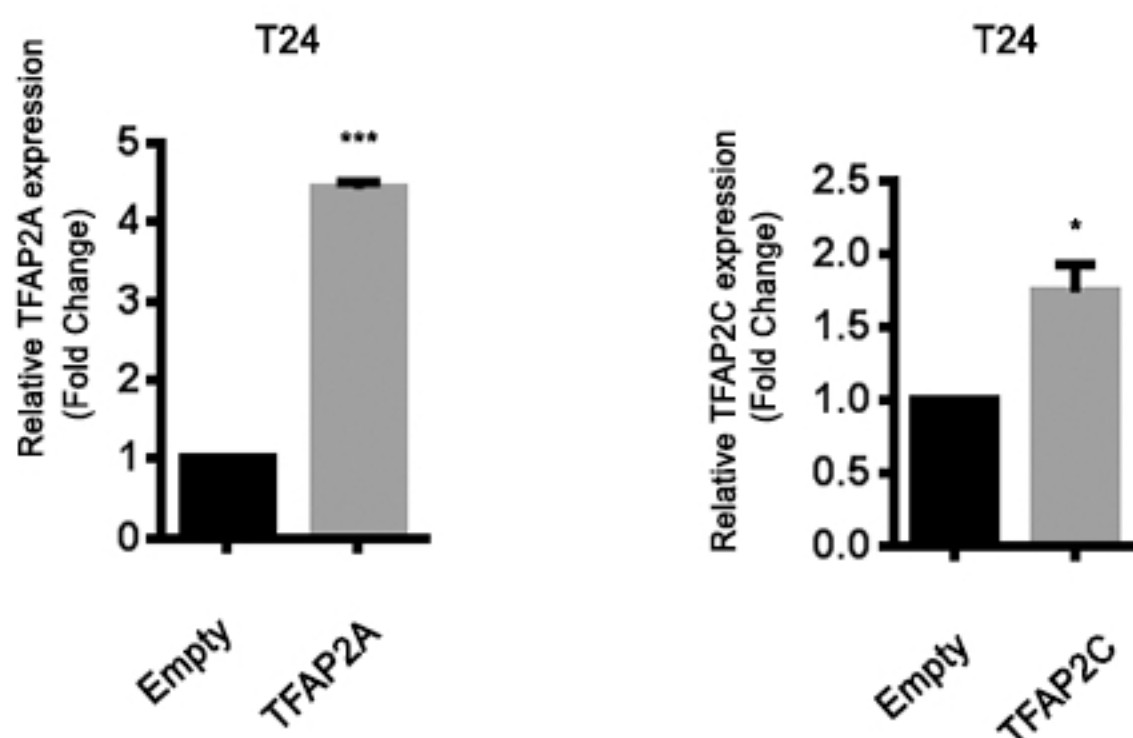

Supplement: Supplementary file [file 401307-1.pdf]
